# Supplementary material for: Synthesis and characterization of 2,7-bis(pentafluorophenylethynyl)hexafluoroheterofluorenes: new materials with high electron affinities
Source: Royal Society of Chemistry journal article supplement (doi:10.1039/b813440e), 2008-01-01
Supplement: b813440e.pdf [file b813440e.pdf]

Supporting Information for:

Synthesis and Characterization of 2,7-  
bis(pentafluorophenylethynyl)-  
hexafluoroheterofluorenes: New Materials with  
High Electron Affinities

*Katharine Geramita<sup>1</sup>, Jennifer McBee<sup>1</sup>, Yuefei Tao<sup>2</sup>, Rachel A. Segalman<sup>2</sup> and T. Don  
Tilley<sup>1\*</sup>*

<sup>1</sup>Department of Chemistry University of California at Berkeley, Berkeley California  
94720

<sup>2</sup>Department of Chemical Engineering University of California at Berkeley, Berkeley  
California 94720

### 1) Experimental

**General.** All reactions were performed under an inert atmosphere of nitrogen using standard Schlenk techniques. Tetrahydrofuran (THF) was dried over Na and stored under nitrogen. Hexanes, Et<sub>2</sub>O and toluene were dried on a VAC systems solvent purifier column and stored under nitrogen. Dichlorophenylphosphine, dichloroethylphosphine, hydrogen peroxide (30% in water), butyl lithium (1.6 M in hexanes), tetrabutylammonium hexafluorophosphate (Aldrich), dibromotetrafluorobenzene (Oakwood Products Inc) and dichlorodiphenylgermane, dichlorodiethylgermane (Gelest) were used as received. Dichlorodiphenylsilane and dichlorodimethylsilane (Gelest) was distilled prior to use. UV-vis spectra were measured with a Varian Cary 300 Bio UV-vis spectrometer and all samples were measured in THF unless otherwise stated. Emission spectra were measured with the Varian Cary Eclipse Spectrometer. Fluorescence quantum yields ( $\Phi_{PL}$ ) were calculated with respect to freshly sublimed 9,9-diphenylanthracene in THF ( $\Phi = 0.90$ ). Unless otherwise stated, <sup>1</sup>H, <sup>31</sup>P and <sup>19</sup>F NMR spectra were measured in CDCl<sub>3</sub> with a Bruker AVQ 400 MHz spectrometer. All chemical shifts are reported in ppm units. For <sup>19</sup>F NMR spectra C<sub>6</sub>F<sub>6</sub> was used as internal reference at -163 ppm and <sup>1</sup>H NMR chemical shifts were referenced to the residual peak of the deuterated solvent at 7.26 ppm for CDCl<sub>3</sub>. Melting point determinations were performed by a Melt Temp II instrument and are uncorrected. Cyclic voltammetry was performed on a Bioanalytical Systems CV-50W Voltammetric Analyzer with a C-3 Cell Stand. The potentials were measured vs a Ag/AgNO<sub>3</sub> nonaqueous reference electrode, with Pt disc (PTE) as working electrode and a Pt wire axial electrode, in acetonitrile containing 0.1 mol/L tetrabutylammoniumhexafluorophosphate, with ferrocene as external standard (HOMO =

-4.8 eV) and potential sweep rate of 100 mV/s unless otherwise stated. All elemental analyses were obtained at the Micro-Mass Facility of the University of California, Berkeley. Lithium triisopropylsilylacetylene was made from triisopropylsilylacetylene and BuLi in hexanes and 2,2'-dibromooctafluorobiphenyl was prepared as described in the literature.<sup>1</sup>

**2,2'-dibromo-4,4'-bis(pentafluorophenylethynyl)-hexafluorobiphenyl (1).** To a solution of 2,2'-dibromooctafluorobiphenyl (0.230 g, 0.5 mmol) in toluene (25 mL) at room temperature a solution of lithium triisopropylsilylacetylene (0.210 g, 1.1 mmol) in THF (8 mL) was added. The resulting solution was stirred for 3 - 5 days. The resulting yellow solution was washed with water (2 x 30 mL). The organic components were dried over MgSO<sub>4</sub> and filtered through celite. The resulting solution was then diluted with wet toluene (600 mL) and distilled THF (45 mL). The solution was sparged with nitrogen for 20 min and then Bu<sub>4</sub>NF (1.1 mL, 1.0 M in THF 1% H<sub>2</sub>O) was added, and then the resulting solution was stirred for 5 minutes. The light brown solution was washed with water (2 x 150 mL) and the organic components were dried over MgSO<sub>4</sub> and passed through a silica plug. The resulting solution was concentrated via rotary evaporation. *Note: It is critical at this step to not mix concentrated solutions of unprotected diyne with THF or CH<sub>2</sub>Cl<sub>2</sub>. This will result in decomposition of the compound.* To the concentrated solution was added NEt<sub>3</sub> (25 mL) and iodopentafluorobenzene (0.730 g, 2.5 mmol) and the solution was sparged with nitrogen for 10 minutes. The degassed solution was added to a Schlenk flask containing PdCl<sub>2</sub>(PPh<sub>3</sub>)<sub>2</sub> (0.020 g, 0.03 mmol), CuI (0.020 g, 0.1 mmol) and PPh<sub>3</sub> (0.015 g, 0.05 mmol) and the entire mixture was heated at 40 °C for 12 h, with vigorous stirring, under a flow of nitrogen. Toluene (20 mL) was added to the

solution and the mixture was washed with aqueous  $\text{NH}_4\text{Cl}$  (2 x 20 mL) and water (2 x 20 mL). The collected organic components were dried with  $\text{MgSO}_4$ , filtered through celite and concentrated via rotary evaporation. The disubstituted product was isolated via column chromatography (hexanes) to give 0.190 g (0.24 mmol, 47 %) of **1** as a white powder.  $^{19}\text{F}$  NMR ( $\text{CDCl}_3$ , 400 MHz, 25 °C)  $\delta$  -101.74 (1F, m), -129.48 (1F, m), -135.44 (2F, m), -136.82 (1F, m), -150.37 (1F, m), -161.88 (2F, m). Anal. Calcd for  $\text{C}_{28}\text{Br}_2\text{F}_{16}$ : C, 42.03. Found: C, 42.05. mp > 250 °C dec

**2,7-bis(pentafluorophenylethynyl)-9,9-diphenyl-hexafluorosilafluorene (2a).** 2,2'-dibromo-4,4'-bis(pentafluorophenylethynyl)hexafluorobiphenyl (0.055 g, 0.07 mmol) was dissolved in toluene/ $\text{Et}_2\text{O}$  (10 mL/ 2 mL) and the mixture was cooled to -78 °C. To this was added butyllithium (0.08 mL, 1.6 M in hexanes) and the resulting solution was stirred for 20 min at -78 °C, after which dichlorodiphenylsilane (0.05 mL) in THF (1 mL) was added and the entire solution was allowed to warm to room temperature over 12 h with stirring. The resulting yellow solution was quenched with water (2 x 15 mL) and the organic components were extracted into  $\text{CH}_2\text{Cl}_2$  (2 x 20 mL). The combined extracts were dried over  $\text{MgSO}_4$ , filtered through celite and concentrated via rotary evaporation. The disubstituted product was isolated via recrystallization from hot hexanes to give trace amounts of **2a** as a white powder.  $^1\text{H}$  NMR ( $\text{CDCl}_3$ , 400 MHz, 25 °C)  $\delta$  7.455 (2H, m), 7.529 (1H, m), 7.67 (2H, m);  $^{19}\text{F}$  NMR ( $\text{CDCl}_3$ , 400 MHz, 25 °C)  $\delta$  -98.21 (1F, m), -123.15 (1F, m), -131.81 (1F, m), -135.76 (2F, m), -151.09 (1F, m), -162.16 (2F, m). Insufficient amounts of pure **2a** were isolated to allow full characterization thus identity and purity are shown by  $^1\text{H}$  and  $^{19}\text{F}$  NMR.

**2,7-bis(pentafluorophenylethynyl)-9,9-dimethyl-hexafluorosilafluorene (2b).** 2,2'-dibromo-4,4'-bis(pentafluorophenylethynyl)-hexafluorobiphenyl (0.050 g, 0.06 mmol) was dissolved in toluene/Et<sub>2</sub>O (10 mL/ 2 mL) and the mixture was cooled to – 78 °C. To this was added butyllithium (0.08 mL, 1.6 M in hexanes) and the resulting solution was stirred for 20 min at -78 °C, after which dichlorodimethylsilane (0.05 mL) was added and the entire solution was allowed to warm to room temperature over 12 h with stirring. The resulting yellow solution was quenched with water (2 x 15 mL) and the organic components were extracted into CH<sub>2</sub>Cl<sub>2</sub> (2 x 20 mL). The extracts were dried over MgSO<sub>4</sub>, filtered through celite and concentrated via rotary evaporation. The disubstituted product was isolated via recrystallization from hot hexanes to give 0.026 g (0.04 mmol, 60 %) of **2b** as a white powder. <sup>1</sup>H NMR (CDCl<sub>3</sub>, 400 MHz, 25 °C) δ 0.627 (s); <sup>19</sup>F NMR (CDCl<sub>3</sub>, 400 MHz, 25 °C) δ -102.35 (1F, m), -124.41 (1F, m), -132.68 (1F, m), -135.91 (2F, m), -151.23 (1F, m), -162.21 (2F, m). Anal. Calcd for C<sub>30</sub>H<sub>6</sub>SiF<sub>16</sub>: C, 51.59; H, 0.87. Found: C, 51.36; H, 0.54. m.p. 227-229 °C

**2,7-bis(pentafluorophenylethynyl)-9,9-diphenyl-hexafluorogermafluorene (3a).** 2,2'-dibromo-4,4'-bis(pentafluorophenylethynyl)hexafluorobiphenyl (0.075 g, 0.09 mmol) was dissolved in toluene/Et<sub>2</sub>O (10 mL/ 2 mL) and the mixture was cooled to – 78 °C. To this was added butyllithium (0.12 mL, 1.6 M in hexanes) and the resulting solution was stirred for 20 min at -78 °C, after which dichlorodiphenylgermane (0.1 mL) in THF (1 mL) was added and the entire solution was allowed to warm to room temperature over 12 h with stirring. The resulting yellow solution was quenched with water (2 x 15 mL) and the organic components were extracted into CH<sub>2</sub>Cl<sub>2</sub> (2 x 20 mL). The extracts were dried over MgSO<sub>4</sub>, filtered through celite and concentrated via rotary

evaporation. The disubstituted product was isolated via recrystallization from hot hexanes to give 0.046 g (0.05 mmol, 57 %) of **3a** as a white powder.  $^1\text{H}$  NMR ( $\text{CDCl}_3$ , 400 MHz, 25 °C)  $\delta$  7.422 – 7.492 (3H, m), 7.603 (2H, m);  $^{19}\text{F}$  NMR ( $\text{CDCl}_3$ , 400 MHz, 25 °C)  $\delta$  -98.50 (1F, m), -124.44 (1F, m), -130.92 (1F, m), -135.76 (2F, m), -151.09 (1F, m), -162.17 (2F, m). Anal. Calcd for  $\text{C}_{40}\text{H}_{10}\text{GeF}_{16}$ : C, 55.41; H, 1.16. Found: C, 55.76; H, 0.96. m.p. 277- 280 °C

**2,7-bis(pentafluorophenylethynyl)-9,9-diethyl-hexafluorogermafluorene (3b).** 2,2'-dibromo-4,4'-bis(pentafluorophenylethynyl)hexafluorobiphenyl (75 mg, 0.09 mmol) was dissolved in toluene/ $\text{Et}_2\text{O}$  (10 mL/ 2 mL) and cooled to – 78 °C. To this was added butyllithium (0.12 mL, 1.6 M in hexanes) and the solution was stirred for 20 min at -78 °C, after which dichlorodiethylgermane (0.1 mL) in THF (1.5 mL) was added and the entire solution was allowed to warm to room temperature over 12 hours. The resulting yellow solution was quenched with water (2 x 15 mL) and the organic components were extracted into  $\text{CH}_2\text{Cl}_2$ . The extracts were dried over  $\text{MgSO}_4$  and concentrated via rotary evaporation. The disubstituted product was isolated via recrystallization from hot hexanes to give 56 mg (60 %, 0.06 mmol) of **3b** as a white powder.  $^1\text{H}$  NMR ( $\text{CDCl}_3$ , 400 MHz, 25 °C)  $\delta$  1.107 (3H, t), 1.439 (2H, q);  $^{19}\text{F}$  NMR ( $\text{CDCl}_3$ , 400 MHz, 25 °C)  $\delta$  -99.80 (1F, m), -125.81 (1F, m), -131.73 (1F, m), -135.92 (2F, m), -151.32 (1F, m), -162.28 (2F, m). Anal. Calcd for  $\text{C}_{32}\text{H}_{10}\text{GeF}_{16}$ : C, 49.85; H, 1.31. Found: C, 49.94; H, 1.22. m.p. 237-240 °C

**2,7-bis(pentafluorophenylethynyl)-9-phenyl-hexafluorophosphafluorene oxide (4a).** 2,2'-dibromo-4,4'-bis(pentafluorophenylethynyl)hexafluorobiphenyl (0.060 g, 0.07 mmol) was dissolved in toluene/ $\text{Et}_2\text{O}$  (10 mL/ 2 mL) and the mixture was cooled to – 78

°C. To this was added butyllithium (0.08 mL, 1.6 M in hexanes) and the resulting solution was stirred for 20 min at -78 °C, after which dichloroethylphosphine (0.05 mL) was added and the entire solution was allowed to warm to room temperature over 12 h with stirring. The resulting yellow solution was quenched with water (2 x 15 mL) and the organic components were extracted into CH<sub>2</sub>Cl<sub>2</sub> (2 x 20 mL). H<sub>2</sub>O<sub>2</sub> (0.1 mL, 30 wt% solution in H<sub>2</sub>O) was added and the mixture was stirred at room temperature for 4 h. The light yellow solution was washed with water (2 x 25 mL) and the organic components were dried with MgSO<sub>4</sub>, filtered through celite and dried under rotary evaporation. The disubstituted product was isolated via slow evaporation of CH<sub>2</sub>Cl<sub>2</sub> from hot hexanes/CH<sub>2</sub>Cl<sub>2</sub> to give 0.030 g (0.04 mmol, 55 %) of **4a** as a white powder. <sup>1</sup>H NMR (CDCl<sub>3</sub>, 400 MHz, 25 °C) δ 7.555 (2H, td), 7.672 (1H,t), 7.765 (2H, dd); <sup>19</sup>F NMR (CDCl<sub>3</sub>, 400 MHz, 25 °C) δ -104.68 (1F, m), -118.06 (1F, m), -131.55 (1F, m), -135.29 (2F, m), -149.95 (1F, m), -161.75 (2F, m); <sup>31</sup>P (CDCl<sub>3</sub>, 161.6 MHz, 25 °C) δ 26.32. Anal. Calcd for C<sub>34</sub>H<sub>5</sub>POF<sub>16</sub>: C, 53.43; H, 0.66. Found: C, 53.32; H, 0.57. m.p. 301- 303 °C

**2,7-bis(pentafluorophenylethynyl)-9-ethyl-hexafluorophosphafluorene oxide (4b)**  
2,2'-dibromo-4,4'-bis(pentafluorophenylethynyl)hexafluorobiphenyl (0.060 g, 0.07 mmol) was dissolved in toluene/Et<sub>2</sub>O (10 mL/ 2 mL) and the mixture was cooled to - 78 °C. To this was added butyllithium (0.08 mL, 1.6 M in hexanes) and the solution was stirred for 20 min at -78 °C, after which dichloroethylphosphine (0.05 mL) was added and the entire solution was allowed to warm to room temperature over 12 h with stirring. The resulting yellow solution was quenched with water (2 x 15 mL) and the organic components were extracted into CH<sub>2</sub>Cl<sub>2</sub> (2 x 20 mL). H<sub>2</sub>O<sub>2</sub> (0.1 mL, 30 wt% solution in H<sub>2</sub>O) was added and the mixture was stirred at room temperature for 4 h. The light

yellow solution was washed with water (2 x 25 mL) and the organic components were dried with MgSO<sub>4</sub>, filtered through celite and dried under rotary evaporation. The disubstituted product was isolated via slow evaporation of CH<sub>2</sub>Cl<sub>2</sub> from hot hexanes/CH<sub>2</sub>Cl<sub>2</sub> to give 0.030 g (0.04 mmol, 55 %) of **4b** as a white powder. <sup>1</sup>H NMR (CDCl<sub>3</sub>, 400 MHz, 25 °C) δ 1.175 (3H, dt), 2.495 (2H,m); <sup>19</sup>F NMR (CDCl<sub>3</sub>, 400 MHz, 25 °C) δ -105.45 (1F, m), -118.33 (1F, m), -131.42 (1F, m), -135.25 (2F, m), -149.90 (1F, m), -161.71 (2F, m), <sup>31</sup>P (CDCl<sub>3</sub>, 161.6 MHz, 25 °C) δ 41.62. Anal. Calcd for C<sub>30</sub>H<sub>5</sub>POF<sub>16</sub>: C, 50.30; H, 0.70. Found: C, 50.36; H, 0.61. m.p. 266 – 267 °C

#### Solar Cell Device Construction and Measurement

150 nm sputtered ITO-coated (20 Ω m<sup>-1</sup>) glass substrates were obtained from Thin Film Devices, Inc. The substrates were subjected to ultrasonication for 20 min in acetone, and then 2% Helmanex soap in water for 20 min, followed by extensive rinsing with deionized water and ultrasonication in deionized water and then 2-propanol. The substrates were then dried under a stream of nitrogen before treatment for 10 min in an oxygen plasma at 300 mtorr (1 torr = 133.28 Pa) at high power. PEDOT:PSS in water (Baytron-P) was filtered through a 0.45 μm filter and spin-coated onto the ITO surface at 4000 rpm for 60 s and baked for 1 h at 125 °C, affording a 30 nm layer.. All procedures after this point were performed in an inert-atmosphere glove box. Solutions of P3HT, **3b** and **4b** were prepared separately in CHCl<sub>3</sub> (10 mg mL<sup>-1</sup>). Immediately prior to deposition, the solutions were passed though a 0.2 μm polytetrafluoroethylene syringe filter. For a 1:1 P3HT/**3b** or P3HT/**4b** device, equal amounts of each solution were combined. The blend solution was applied to the substrate and spun at 1000 rpm for 60 s. A small portion of the organic layer was removed with tweezers to allow contact with the



ITO. The substrates were then placed in a resistive-heating evaporation chamber and held under vacuum ( $10^{-7}$  torr) for 4 h before evaporating 100 nm of Al through a shadow mask at a rate of 0.1–0.5  $\text{nm s}^{-1}$  while rotating the substrates at approximately 1 Hz to ensure even electrode deposition. The configuration of the shadow mask afforded eight independent devices on each substrate and one rectangular pad to connect the Al to the ITO substrate. Devices were left to cool to room temperature before further processing. Testing of the devices was performed under an argon atmosphere with an oriel xenon arc lamp with an AM 1.5G solar filter. Current–voltage behavior was measured with a Keithly 236 SMU instrument. Reported efficiencies are the average from 8 independent measurements made on one spin coated device.

References:

1. Cohen, S.; Fenton, D.; Tomlinson, A.; Massey, A. *J. Organometal. Chem.* **1966**, *6*, 301.

## 2) <sup>1</sup>H and <sup>19</sup>F NMR Spectra of Compounds 2a

### Compound 2a

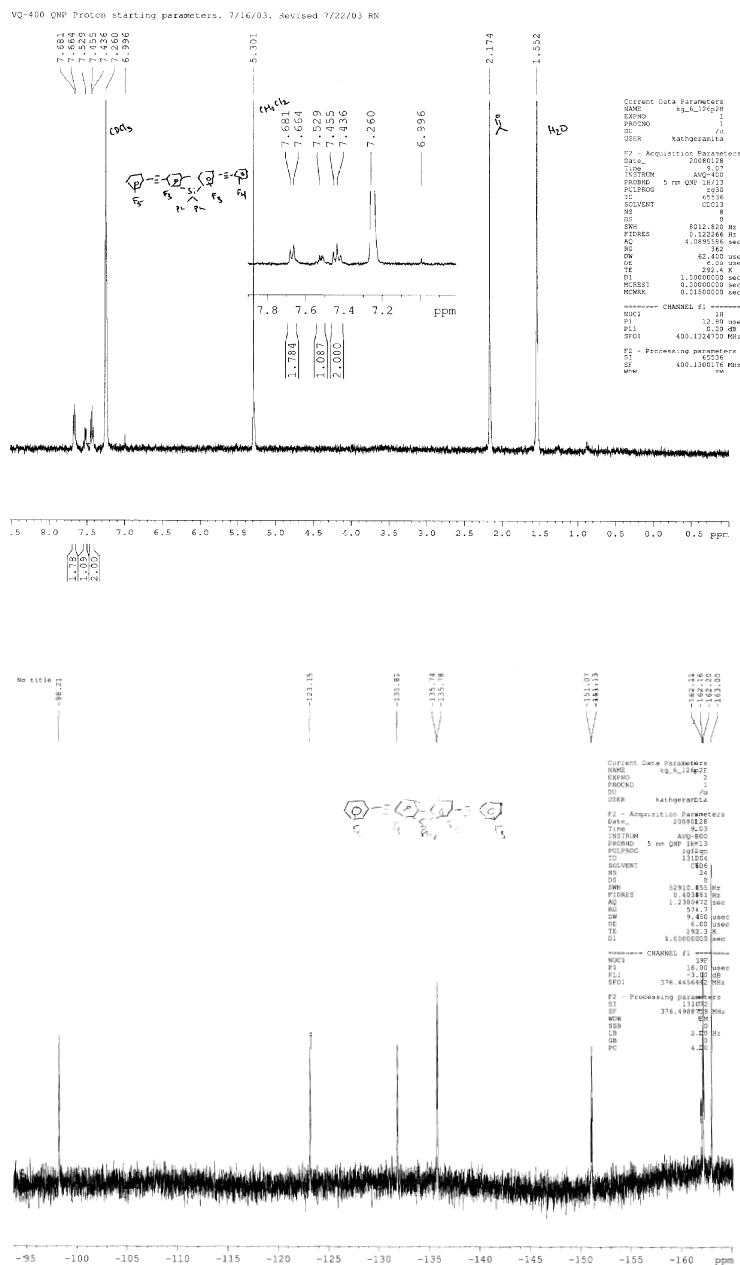

### 3) Optical Spectroscopy Data

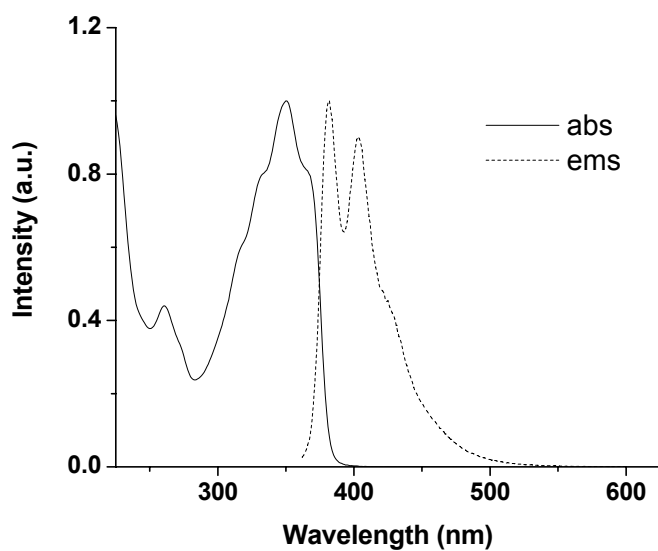

Figure S.1 Normalized Absorption and Emission Spectra for **2a** in THF.

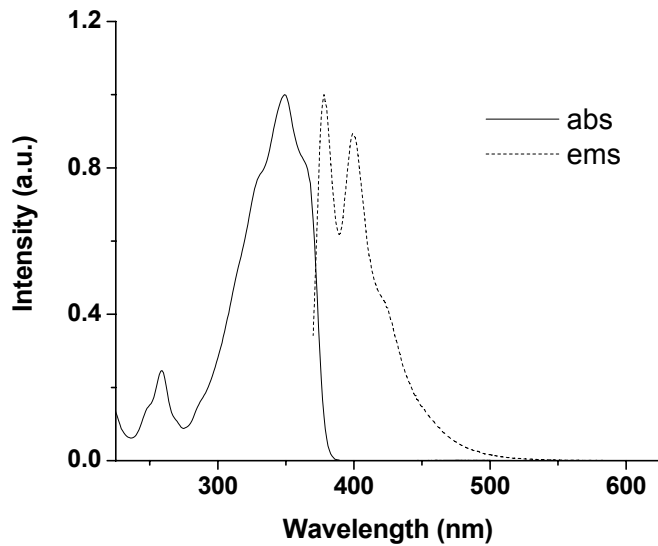

Figure S.2 Normalized Absorption and Emission Spectra for **2b** in THF.

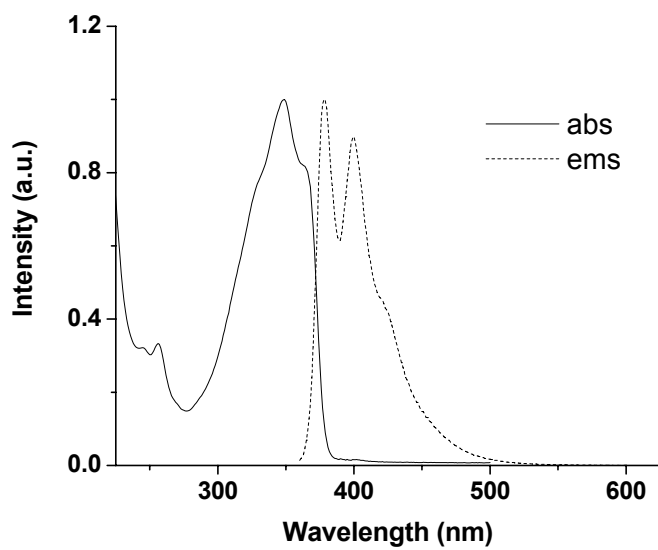

Figure S.3 Normalized Absorption and Emission Spectra for **3a** in THF.

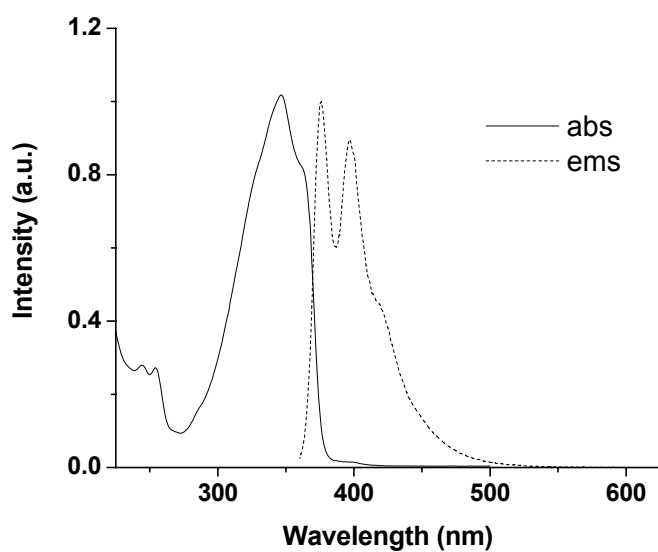

Figure S.4 Normalized Absorption and Emission Spectra for **3b** in THF.

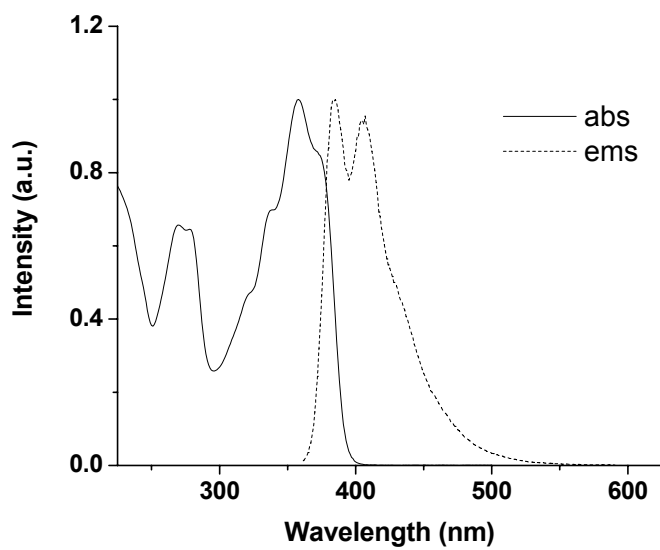

Figure S.5 Normalized Absorption and Emission Spectra for **4a** in THF.

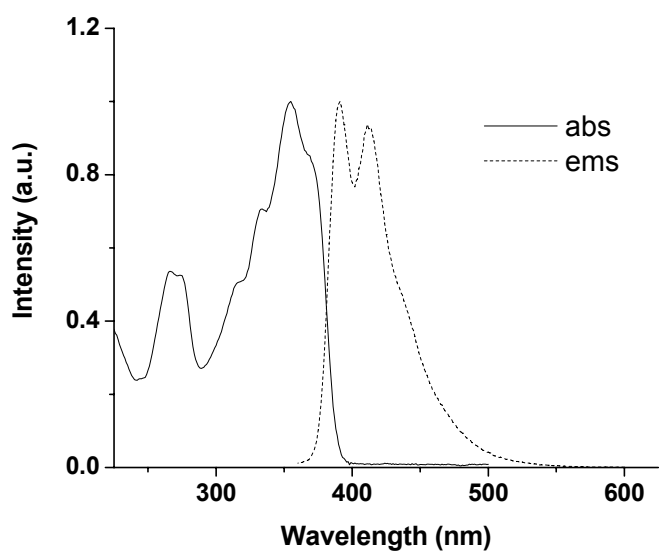

Figure S.6 Normalized Absorption and Emission Spectra for **4b** in THF.

#### 4) Electrochemical Data

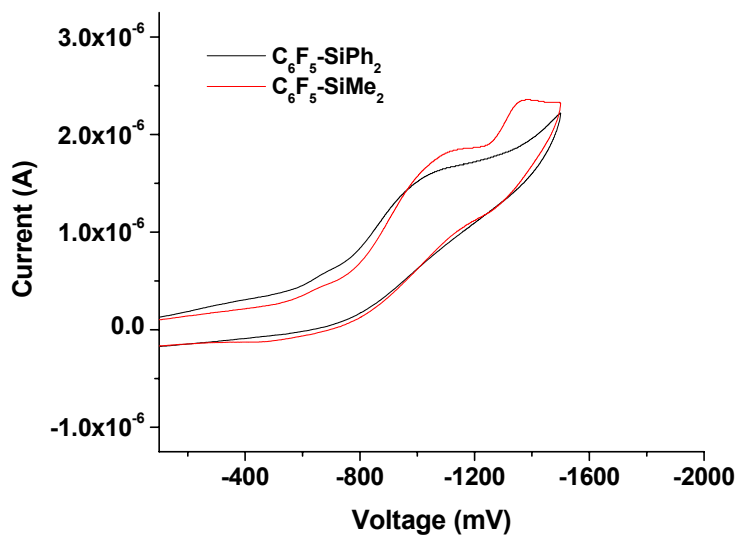

Figure S.7 Reduction behavior for **2a** (black), **2b** (red) in 0.1 M  $\text{Bu}_4\text{NPF}_6$  in MeCN/PhMe, Ag wire used as reference electrode.

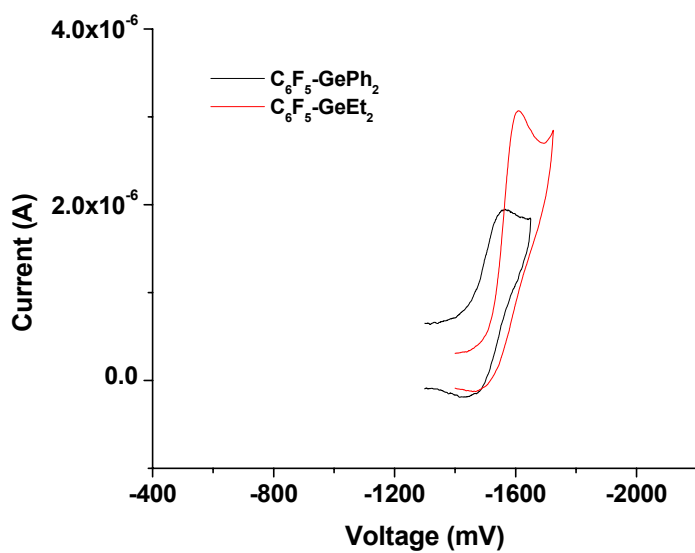

Figure S.8 Reduction behavior for **3a** (black), **3b** (red) in 0.1 M  $\text{Bu}_4\text{NPF}_6$  in MeCN.

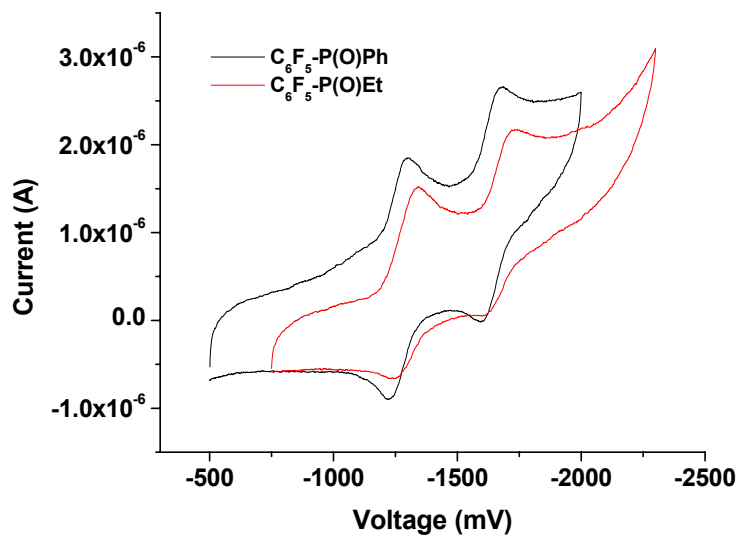

Figure S.9 Reduction behavior for **4a** (black), **4b** (red) in 0.1 M  $\text{Bu}_4\text{NPF}_6$  in MeCN.

### 5) Additional Photo Volataic Performance Data

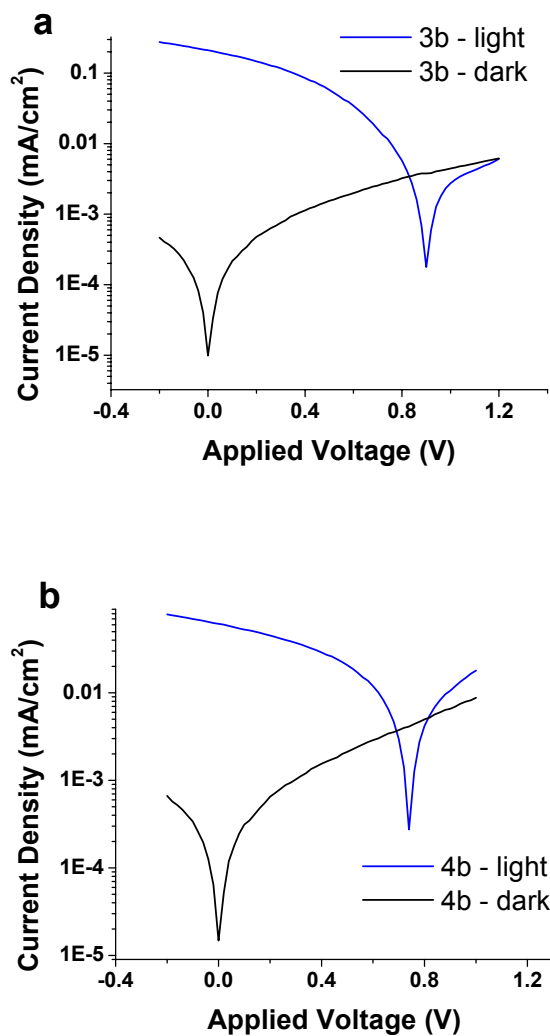

**Figure S. 10** Light (blue) and dark (black) photocurrent response of spin coated devices with **3b**/P3HT blend (a) and **4b**/P3HT blend (b).



## 5) Crystal Structure Data

### General Comments:

It is worth noting that collection out to 25 degrees was performed however, poor crystal quality resulted in no reflections past 20 degrees. Additionally, a cut-off was made in the integration to preserve the integrity of the absorption correction. The poor data:parameter ratio in these crystals can be attributed to both poor crystal quality and the lack of high angle data.

### Compound 4a

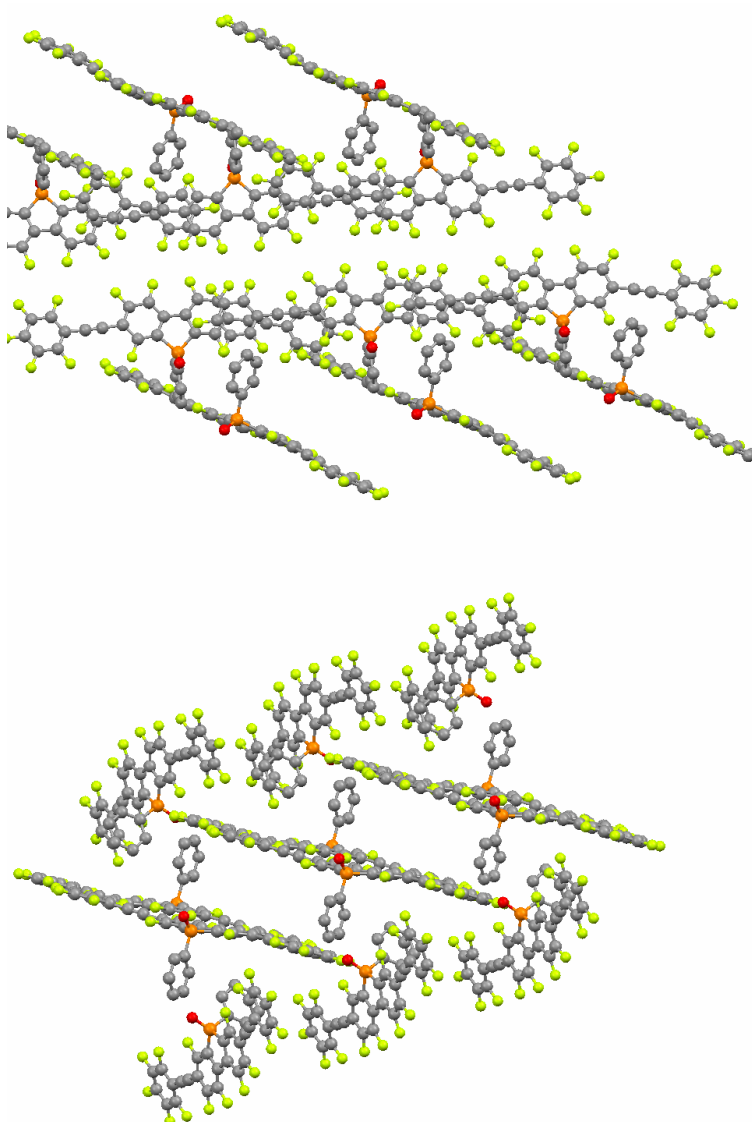

**Figure S11.** Crystal structures for phosphafuorene **4a**, illustrating the bi-directional nature of the crystal packing. Hydrogen atoms have been removed for clarity.

Supplementary Material (ESI) for Chemical Communications  
This journal is (c) The Royal Society of Chemistry 2008

Data Collection

A fragment of a colorless needle-like crystal of C<sub>34</sub> H<sub>5</sub> F<sub>16</sub> O<sub>2</sub> P having approximate dimensions of 0.2 x 0.07 x 0.07 mm was mounted on a glass fiber using Paratone N hydrocarbon oil. All measurements were made on a CCD area detector<sup>10</sup> CCD area detector with graphite monochromated MoK radiation.

Cell constants and an orientation matrix, obtained from a least-squares refinement using the measured positions of 986 centered reflections with  $I > 10\sigma(I)$  in the range  $2.35 < \theta < 19.08^\circ$  corresponded to a primitive Monoclinic cell with dimensions:

$$\begin{array}{ll} a = 13.798(13) \text{ \AA} & \alpha = 90^\circ \\ b = 5.938(5) \text{ \AA} & \beta = 100.599(16)^\circ \\ c = 35.27(3) \text{ \AA} & \gamma = 90^\circ \\ V = 8876(1) \text{ \AA}^3 & \end{array}$$

For  $Z = 4$  and F.W. = 764.35, the calculated density is 1.788 g/cm<sup>3</sup>.

Analysis of the systematic absences allowed the space group to be uniquely determined to be:

$$P2(1)/n$$

The data were collected at a temperature of 140(2) K. Frames corresponding to an arbitrary hemisphere of data were collected using  $\omega$  scans of  $0.3^\circ$  counted for a total of 30 seconds per frame.

Data Reduction

Data were integrated by the program SAINT<sup>11</sup> to a maximum  $\theta$  value of  $20.86^\circ$ . The data were corrected for Lorentz and polarization effects. Data were analyzed for agreement and possible absorption using XPREP<sup>12</sup>. An empirical absorption correction based on comparison of redundant and equivalent reflections was applied using SADABS<sup>13</sup>. ( $T_{\text{max}} = 0.990$ ,  $T_{\text{min}} = 0.981$ ). Of the 9224 reflections that were collected, 2955 were unique ( $R_{\text{int}} = 0.0957$ ); equivalent reflections were merged. No decay correction was applied.

Structure Solution and Refinement

The structure was solved by direct methods<sup>1</sup> and expanded using Fourier techniques<sup>2</sup>. All non-hydrogen atoms were refined anisotropically. Hydrogen atoms were included but not refined. The final cycle of full-matrix least-squares refinement<sup>3</sup> was based on 2955 reflections (all data) and 469 variable parameters and converged (largest parameter shift was 0.001 times its esd) with conventional unweighted and weighted agreement factors of:

$$R_1 = \sum ||F_o| - |F_c|| / \sum |F_o| = 0.0374 \text{ for } 1603 \text{ data with } I > 2\sigma(I)$$

$$wR_2 = [(\sum w (|F_o|^2 - |F_c|^2)^2 / \sum w |F_o|^2)]^{1/2} = 0.0420$$

The standard deviation of an observation of unit weight<sup>4</sup> was 0.798. The weighting scheme was based on counting statistics and included a factor to down weight the intense reflections. The maximum and minimum peaks on the final difference Fourier map corresponded to 0.236 and  $-0.280 \text{ e}^-/\text{\AA}^3$ , respectively.

Neutral atom scattering factors were taken from Cromer and Waber<sup>5</sup>. Anomalous dispersion effects were included in  $F_{\text{calc}}$ <sup>6</sup>; the values for  $\Delta f'$  and  $\Delta f''$  were those of Creagh and McAuley<sup>7</sup>. The values for the mass attenuation coefficients are those of Creagh and Hubbel<sup>8</sup>. All calculations were performed using the SHELXTL<sup>9</sup> crystallographic software package of Bruker Analytical X-ray Systems Inc.

*References*

Supplementary Material (ESI) for Chemical Communications  
This journal is (c) The Royal Society of Chemistry 2008

(1) XS: Program for the Solution of X-ray Crystal Structures, Part of the SHELXTL Crystal Structure Determination Package, Bruker Analytical X-ray Systems Inc.: Madison, WI, (1995-99)

(2) XL: Program for the Refinement of X-ray Crystal Structures, Part of the SHELXTL Crystal Structure Determination Package, Bruker Analytical X-ray Systems Inc.: Madison, WI, (1995-99)

(3) Least-Squares:

$$\text{Function minimized } \sum w (|F_o|^2 - |F_c|^2)^2$$

(4) Standard deviation of an observation of unit weight:

$$[\sum w (|F_o|^2 - |F_c|^2)^2 / (N_o - N_v)]^{1/2}$$

where  $N_o$  = number of observations  
 $N_v$  = number of variables

(5) Cromer, D. T. & Waber, J. T.; "International Tables for X-ray Crystallography", Vol. IV, The Kynoch Press, Birmingham, England, Table 2.2 A (1974).

(6) Ibers, J. A. & Hamilton, W. C.; Acta Crystallogr., 17, 781 (1964).

(7) Creagh, D. C. & McAuley, W.J. .; "International Tables for Crystallography", Vol C, (A.J.C. Wilson, ed.), Kluwer Academic Publishers, Boston, Table 4.2.6.8, pages 219-222 (1992).

(8) Creagh, D. C. & Hubbell, J.H..; "International Tables for Crystallography", Vol C, (A.J.C. Wilson, ed.), Kluwer Academic Publishers, Boston, Table 4.2.4.3, pages 200-206 (1992).

(9) XP: Molecular Graphics program. Part of the SHELXTL Structure Determination Package. Bruker Analytical X-ray Systems Inc.: Madison, WI, (1995-99)

(10) SMART: Area-Detector Software Package, Bruker Analytical X-ray Systems, Inc.: Madison, WI, (1995-99)

(11) SAINT: SAX Area-Detector Integration Program, V5.04; Siemens Industrial Automation, Inc.: Madison, WI, (1995)

(12) XPREP:(v 5.03) Part of the SHELXTL Crystal Structure Determination Package, Siemens Industrial Automation, Inc.: Madison, WI, (1995)

(13) SADABS: Siemens Area Detector ABSorption correction program, George Sheldrick, (1996).  
Advance copy, private communication.

## EXPERIMENTAL DETAILS

### A. Crystal Data

|                      |                                                                                                                              |
|----------------------|------------------------------------------------------------------------------------------------------------------------------|
| Empirical Formula    | C <sub>34</sub> H <sub>5</sub> F <sub>16</sub> O P                                                                           |
| Formula Weight       | 764.35                                                                                                                       |
| Crystal Color, Habit | colorless, needle                                                                                                            |
| Crystal Dimensions   | 0.2 x 0.07 x 0.07 mm                                                                                                         |
| Crystal System       | Monoclinic                                                                                                                   |
| Lattice Type         | primitive                                                                                                                    |
| Lattice Parameters   | a = 13.798(13) Å<br>b = 5.938(5) Å<br>c = 35.27(3) Å<br>α = 90°<br>β = 100.599(16)°<br>γ = 90°<br>V = 2840(5) Å <sup>3</sup> |
| Space Group          | P2(1)/n                                                                                                                      |
| Z value              | 4                                                                                                                            |
| D <sub>calc</sub>    | 1.788 g/cm <sup>3</sup>                                                                                                      |
| F <sub>000</sub>     | 1504                                                                                                                         |
| μ (MoK)              | 0.23 cm <sup>-1</sup>                                                                                                        |

### B. Intensity Measurements

|                             |                                                                                            |
|-----------------------------|--------------------------------------------------------------------------------------------|
| Diffractometer              | CCD area detector                                                                          |
| Radiation                   | MoK(λ = 0.71073 Å)<br>graphite monochromated                                               |
| Detector Position           | 60.00 mm                                                                                   |
| Exposure Time               | 30 seconds per frame.                                                                      |
| Scan Type                   | ω (0.3 degrees per frame)                                                                  |
| θ <sub>max</sub>            | 20.86°                                                                                     |
| No. of Reflections Measured | Total: 9224<br>Unique: 2955 (R <sub>int</sub> = 0.0957)                                    |
| Corrections                 | Lorentz-polarization<br>Absorption (T <sub>max</sub> = 0.990,<br>T <sub>min</sub> = 0.981) |

### C. Structure Solution and Refinement

|                                                  |                                                                                    |
|--------------------------------------------------|------------------------------------------------------------------------------------|
| Structure Solution                               | direct (SHELXS-97 (Sheldrick, 1990))                                               |
| Refinement                                       | Full-matrix least-squares                                                          |
| Function Minimized                               | Σw( F <sub>o</sub>   <sup>2</sup> -  F <sub>c</sub>   <sup>2</sup> ) <sup>2</sup>  |
| Least Squares Weighting scheme                   | w = 1/[σ <sup>2</sup> (F <sub>o</sub> <sup>2</sup> ) + (qP) <sup>2</sup> + 0.000P] |
| Anomalous Dispersion                             | where P = [F <sub>o</sub> <sup>2</sup> + 2F <sub>c</sub> <sup>2</sup> ]/3          |
| No. Observations (I > 2.00σ(I))                  | All non-hydrogen atoms<br>1603                                                     |
| No. Variables                                    | 469                                                                                |
| Residuals: R; wR <sub>2</sub> ; R <sub>all</sub> | 0.0374; 0.0420; 0.0909                                                             |
| Goodness of Fit Indicator                        | 0.798                                                                              |
| Max Shift/Error in Final Cycle                   | 0.001                                                                              |
| Maximum peak in Final Diff. Map                  | 0.236 e <sup>-</sup> /Å <sup>3</sup>                                               |
| Minimum peak in Final Diff. Map                  | -0.280 e <sup>-</sup> /Å <sup>3</sup>                                              |

Table 1. Atomic coordinates and U<sub>iso</sub>/U<sub>eq</sub> and occupancy

| atom | x | y | z | U <sub>eq</sub> | Occupancy |
|------|---|---|---|-----------------|-----------|
|------|---|---|---|-----------------|-----------|

Supplementary Material (ESI) for Chemical Communications  
This journal is (c) The Royal Society of Chemistry 2008

|     |           |            |            |          |   |
|-----|-----------|------------|------------|----------|---|
| P1  | 0.7589(1) | 0.4211(2)  | 0.1473(1)  | 0.034(1) | 1 |
| F5  | 1.2203(2) | 0.4800(4)  | 0.0050(1)  | 0.047(1) | 1 |
| F11 | 0.5573(2) | 0.2742(4)  | 0.1666(1)  | 0.043(1) | 1 |
| F7  | 0.9869(2) | 0.1405(4)  | 0.0303(1)  | 0.045(1) | 1 |
| F6  | 0.9459(2) | 0.6563(4)  | 0.1268(1)  | 0.043(1) | 1 |
| F12 | 0.3039(2) | 0.1203(4)  | 0.2066(1)  | 0.051(1) | 1 |
| F10 | 0.5121(2) | -0.3335(4) | 0.0801(1)  | 0.044(1) | 1 |
| F4  | 1.3756(2) | 0.7017(4)  | -0.0131(1) | 0.051(1) | 1 |
| F2  | 1.3354(2) | 1.2813(4)  | 0.0730(1)  | 0.047(1) | 1 |
| F1  | 1.1788(2) | 1.0590(4)  | 0.0922(1)  | 0.047(1) | 1 |
| F8  | 0.8349(2) | -0.0942(4) | 0.0416(1)  | 0.044(1) | 1 |
| F9  | 0.6735(2) | -0.2337(4) | 0.0552(1)  | 0.045(1) | 1 |
| F13 | 0.1479(2) | -0.0003(4) | 0.2383(1)  | 0.054(1) | 1 |
| F14 | 0.0532(2) | -0.3960(4) | 0.2172(1)  | 0.057(1) | 1 |
| O1  | 0.7239(2) | 0.6551(4)  | 0.1489(1)  | 0.038(1) | 1 |
| F16 | 0.2742(2) | -0.5528(4) | 0.1351(1)  | 0.052(1) | 1 |
| F15 | 0.1155(2) | -0.6687(4) | 0.1654(1)  | 0.052(1) | 1 |
| F3  | 1.4325(2) | 1.1028(4)  | 0.0212(1)  | 0.049(1) | 1 |
| C34 | 0.2926(4) | -0.2131(8) | 0.1695(1)  | 0.033(1) | 1 |
| C19 | 0.8556(4) | 0.0928(7)  | 0.0631(1)  | 0.028(1) | 1 |
| C18 | 0.8000(4) | 0.1656(7)  | 0.0896(1)  | 0.028(1) | 1 |
| C7  | 1.1965(3) | 0.7632(7)  | 0.0494(1)  | 0.027(1) | 1 |
| C17 | 0.8354(3) | 0.3555(7)  | 0.1117(1)  | 0.028(1) | 1 |
| C9  | 1.3052(4) | 1.0841(8)  | 0.0567(1)  | 0.032(1) | 1 |
| C15 | 0.9691(3) | 0.4097(8)  | 0.0774(1)  | 0.030(1) | 1 |
| C26 | 0.7055(3) | 0.0782(7)  | 0.0979(1)  | 0.027(1) | 1 |
| C10 | 1.3553(4) | 0.9924(8)  | 0.0297(2)  | 0.032(1) | 1 |
| C12 | 1.2479(4) | 0.6779(8)  | 0.0223(1)  | 0.031(1) | 1 |
| C1  | 0.8213(3) | 0.3201(7)  | 0.1930(1)  | 0.029(1) | 1 |
| C25 | 0.6479(4) | -0.0973(8) | 0.0825(1)  | 0.033(1) | 1 |
| C33 | 0.2434(4) | -0.4135(8) | 0.1604(1)  | 0.034(1) | 1 |
| C23 | 0.5288(4) | -0.0300(8) | 0.1238(1)  | 0.032(1) | 1 |
| C21 | 0.6737(3) | 0.2051(7)  | 0.1270(1)  | 0.024(1) | 1 |
| C6  | 0.8633(3) | 0.1098(7)  | 0.1988(1)  | 0.035(1) | 1 |
| C30 | 0.1795(4) | -0.1336(8) | 0.2118(1)  | 0.040(1) | 1 |
| C20 | 0.9382(4) | 0.2146(8)  | 0.0576(1)  | 0.033(1) | 1 |
| C24 | 0.5621(4) | -0.1503(8) | 0.0949(2)  | 0.033(1) | 1 |
| C31 | 0.1313(4) | -0.3362(9) | 0.2017(2)  | 0.041(2) | 1 |
| C2  | 0.8248(3) | 0.4621(7)  | 0.2240(1)  | 0.036(1) | 1 |
| C32 | 0.1632(4) | -0.4739(8) | 0.1756(2)  | 0.035(1) | 1 |
| C11 | 1.3266(4) | 0.7892(9)  | 0.0133(1)  | 0.037(1) | 1 |
| C14 | 1.0506(4) | 0.5385(8)  | 0.0686(1)  | 0.038(2) | 1 |
| C29 | 0.2584(4) | -0.0761(8) | 0.1960(1)  | 0.033(1) | 1 |
| C8  | 1.2263(4) | 0.9700(8)  | 0.0655(1)  | 0.031(1) | 1 |
| C16 | 0.9152(4) | 0.4708(7)  | 0.1059(1)  | 0.032(1) | 1 |
| C28 | 0.3749(4) | -0.1496(8) | 0.1529(2)  | 0.039(2) | 1 |
| C4  | 0.9151(3) | 0.1877(9)  | 0.2657(1)  | 0.046(2) | 1 |
| C3  | 0.8714(3) | 0.3957(8)  | 0.2605(1)  | 0.048(2) | 1 |
| C13 | 1.1166(4) | 0.6429(8)  | 0.0600(1)  | 0.038(2) | 1 |
| C27 | 0.4426(4) | -0.0975(8) | 0.1387(2)  | 0.037(2) | 1 |
| C22 | 0.5882(4) | 0.1521(7)  | 0.1380(1)  | 0.032(1) | 1 |
| C5  | 0.9108(3) | 0.0437(7)  | 0.2349(2)  | 0.045(2) | 1 |

$U_{eq}$  is defined as one third of the orthogonalized  $U_{ij}$  tensor

Supplementary Material (ESI) for Chemical Communications  
This journal is (c) The Royal Society of Chemistry 2008

Table 2. Anisotropic Displacement Parameters

| atom | U <sub>11</sub> | U <sub>22</sub> | U <sub>33</sub> | U <sub>12</sub> | U <sub>13</sub> | U <sub>23</sub> |
|------|-----------------|-----------------|-----------------|-----------------|-----------------|-----------------|
| P1   | 0.037(1)        | 0.030(1)        | 0.034(1)        | 0.002(1)        | 0.001(1)        | 0.000(1)        |
| F5   | 0.060(2)        | 0.041(2)        | 0.039(2)        | -0.007(1)       | 0.004(2)        | -0.007(1)       |
| F11  | 0.041(2)        | 0.046(2)        | 0.042(2)        | 0.001(2)        | 0.010(2)        | -0.002(1)       |
| F7   | 0.045(2)        | 0.054(2)        | 0.037(2)        | -0.006(1)       | 0.012(2)        | -0.004(1)       |
| F6   | 0.051(2)        | 0.035(2)        | 0.046(2)        | -0.006(1)       | 0.011(2)        | -0.013(1)       |
| F12  | 0.051(2)        | 0.038(2)        | 0.062(2)        | -0.007(1)       | 0.010(2)        | -0.011(2)       |
| F10  | 0.041(2)        | 0.049(2)        | 0.043(2)        | -0.004(1)       | 0.005(1)        | -0.013(1)       |
| F4   | 0.051(2)        | 0.062(2)        | 0.044(2)        | -0.004(2)       | 0.017(2)        | -0.005(2)       |
| F2   | 0.055(2)        | 0.036(2)        | 0.048(2)        | -0.005(1)       | 0.002(2)        | -0.012(1)       |
| F1   | 0.050(2)        | 0.047(2)        | 0.045(2)        | -0.009(2)       | 0.014(2)        | -0.005(2)       |
| F8   | 0.044(2)        | 0.038(2)        | 0.047(2)        | -0.011(1)       | 0.005(2)        | -0.004(1)       |
| F9   | 0.046(2)        | 0.046(2)        | 0.044(2)        | -0.011(2)       | 0.009(2)        | -0.014(1)       |
| F13  | 0.051(2)        | 0.057(2)        | 0.059(2)        | -0.009(2)       | 0.022(2)        | 0.000(1)        |
| F14  | 0.050(2)        | 0.056(2)        | 0.069(2)        | -0.004(2)       | 0.022(2)        | -0.007(2)       |
| O1   | 0.045(2)        | 0.026(2)        | 0.040(2)        | 0.003(2)        | 0.005(2)        | 0.008(2)        |
| F16  | 0.050(2)        | 0.052(2)        | 0.055(2)        | -0.013(2)       | 0.011(2)        | -0.007(2)       |
| F15  | 0.046(2)        | 0.043(2)        | 0.069(2)        | -0.011(2)       | 0.011(2)        | -0.017(1)       |
| F3   | 0.043(2)        | 0.061(2)        | 0.046(2)        | 0.002(2)        | 0.011(2)        | -0.011(2)       |
| C34  | 0.030(4)        | 0.029(4)        | 0.037(4)        | 0.000(3)        | 0.002(3)        | -0.001(3)       |
| C19  | 0.028(4)        | 0.029(3)        | 0.026(4)        | -0.007(3)       | -0.001(3)       | -0.008(3)       |
| C18  | 0.036(4)        | 0.024(3)        | 0.022(3)        | 0.001(3)        | -0.002(3)       | 0.003(3)        |
| C7   | 0.023(4)        | 0.019(3)        | 0.038(4)        | 0.007(3)        | 0.001(3)        | -0.008(3)       |
| C17  | 0.039(4)        | 0.027(3)        | 0.017(3)        | 0.002(3)        | 0.002(3)        | -0.001(3)       |
| C9   | 0.037(4)        | 0.024(3)        | 0.034(4)        | 0.003(3)        | 0.000(3)        | -0.005(3)       |
| C15  | 0.027(4)        | 0.032(3)        | 0.027(4)        | 0.003(3)        | -0.001(3)       | -0.008(3)       |
| C26  | 0.027(4)        | 0.032(3)        | 0.022(3)        | 0.006(3)        | 0.005(3)        | 0.000(3)        |
| C10  | 0.026(4)        | 0.036(4)        | 0.032(4)        | 0.010(3)        | 0.001(3)        | -0.014(3)       |
| C12  | 0.036(4)        | 0.025(3)        | 0.033(4)        | -0.005(3)       | 0.007(3)        | -0.003(3)       |
| C1   | 0.034(3)        | 0.023(3)        | 0.029(3)        | -0.005(3)       | 0.006(3)        | -0.003(2)       |
| C25  | 0.033(4)        | 0.030(3)        | 0.032(4)        | -0.006(3)       | -0.002(3)       | -0.006(3)       |
| C33  | 0.038(4)        | 0.037(4)        | 0.028(4)        | -0.009(3)       | 0.008(3)        | 0.005(3)        |
| C23  | 0.031(4)        | 0.033(4)        | 0.030(4)        | 0.005(3)        | 0.001(3)        | -0.002(3)       |
| C21  | 0.019(3)        | 0.029(3)        | 0.025(4)        | 0.007(3)        | 0.006(3)        | -0.005(3)       |
| C6   | 0.046(3)        | 0.031(3)        | 0.030(4)        | -0.004(3)       | 0.010(3)        | -0.001(3)       |
| C30  | 0.048(4)        | 0.037(4)        | 0.036(4)        | -0.011(3)       | 0.010(3)        | 0.004(3)        |
| C20  | 0.036(4)        | 0.038(4)        | 0.025(4)        | 0.000(3)        | 0.003(3)        | 0.004(3)        |
| C24  | 0.030(4)        | 0.028(3)        | 0.035(4)        | 0.004(3)        | -0.008(3)       | -0.016(3)       |
| C31  | 0.026(4)        | 0.047(4)        | 0.052(4)        | 0.005(3)        | 0.011(3)        | -0.005(3)       |
| C2   | 0.039(4)        | 0.032(3)        | 0.038(4)        | 0.002(3)        | 0.007(3)        | 0.003(2)        |
| C32  | 0.035(4)        | 0.028(4)        | 0.043(4)        | -0.009(3)       | 0.006(3)        | -0.003(3)       |
| C11  | 0.045(4)        | 0.047(4)        | 0.021(4)        | 0.000(3)        | 0.013(3)        | 0.000(3)        |
| C14  | 0.045(5)        | 0.042(4)        | 0.025(4)        | 0.004(3)        | 0.001(3)        | 0.005(3)        |
| C29  | 0.033(4)        | 0.030(3)        | 0.036(4)        | 0.004(3)        | 0.005(3)        | -0.009(3)       |
| C8   | 0.034(4)        | 0.039(4)        | 0.022(4)        | 0.002(3)        | 0.011(3)        | 0.002(3)        |
| C16  | 0.046(4)        | 0.019(3)        | 0.026(4)        | -0.005(3)       | -0.007(3)       | -0.005(3)       |
| C28  | 0.041(5)        | 0.032(3)        | 0.037(4)        | 0.006(3)        | -0.011(3)       | 0.001(3)        |
| C4   | 0.049(4)        | 0.048(4)        | 0.035(4)        | 0.007(3)        | -0.011(3)       | -0.007(3)       |
| C3   | 0.067(4)        | 0.048(4)        | 0.027(4)        | -0.016(3)       | 0.006(3)        | -0.007(3)       |
| C13  | 0.041(4)        | 0.040(4)        | 0.030(4)        | 0.002(3)        | 0.002(3)        | 0.000(3)        |
| C27  | 0.036(5)        | 0.030(3)        | 0.040(4)        | -0.002(3)       | -0.010(3)       | -0.005(3)       |
| C22  | 0.046(4)        | 0.031(4)        | 0.018(3)        | -0.003(3)       | 0.000(3)        | 0.008(3)        |
| C5   | 0.053(4)        | 0.031(3)        | 0.046(4)        | 0.006(3)        | -0.004(3)       | 0.002(3)        |

The general temperature factor expression:

$$\exp(-2\sigma^2(a^2U_{11}h^2 + b^2U_{22}k^2 + c^2U_{33}l^2 + 2a*b*U_{12}hk + 2a*c*U_{13}hl + 2b*c*U_{23}kl))$$

Table 3. Bond Lengths(Å)

| atom | atom | distance | atom | atom | distance |
|------|------|----------|------|------|----------|
| P1   | O1   | 1.476(3) | P1   | C1   | 1.785(4) |
| P1   | C21  | 1.797(4) | P1   | C17  | 1.825(5) |
| F5   | C12  | 1.346(5) | F11  | C22  | 1.372(5) |
| F7   | C20  | 1.346(5) | F6   | C16  | 1.349(4) |
| F12  | C29  | 1.344(4) | F10  | C24  | 1.342(4) |
| F4   | C11  | 1.352(5) | F2   | C9   | 1.335(5) |
| F1   | C8   | 1.349(5) | F8   | C19  | 1.346(4) |
| F9   | C25  | 1.352(5) | F13  | C30  | 1.357(5) |
| F14  | C31  | 1.345(5) | F16  | C33  | 1.342(5) |
| F15  | C32  | 1.347(5) | F3   | C10  | 1.333(5) |
| C34  | C33  | 1.378(6) | C34  | C29  | 1.386(6) |
| C34  | C28  | 1.421(6) | C19  | C18  | 1.382(6) |
| C19  | C20  | 1.393(5) | C18  | C17  | 1.406(5) |
| C18  | C26  | 1.481(6) | C7   | C8   | 1.384(5) |
| C7   | C12  | 1.386(6) | C7   | C13  | 1.421(6) |
| C17  | C16  | 1.344(5) | C9   | C8   | 1.365(6) |
| C9   | C10  | 1.387(6) | C15  | C20  | 1.380(5) |
| C15  | C16  | 1.402(6) | C15  | C14  | 1.441(6) |
| C26  | C25  | 1.362(5) | C26  | C21  | 1.410(5) |
| C10  | C11  | 1.365(6) | C12  | C11  | 1.357(6) |
| C1   | C6   | 1.376(5) | C1   | C2   | 1.376(5) |
| C25  | C24  | 1.373(6) | C33  | C32  | 1.362(6) |
| C23  | C24  | 1.389(6) | C23  | C22  | 1.393(6) |
| C23  | C27  | 1.442(6) | C21  | C22  | 1.344(6) |
| C6   | C5   | 1.375(5) | C6   | H6A  | 0.9300   |
| C30  | C29  | 1.354(6) | C30  | C31  | 1.389(6) |
| C31  | C32  | 1.363(6) | C2   | C3   | 1.384(5) |
| C2   | H2A  | 0.9300   | C14  | C13  | 1.186(6) |
| C28  | C27  | 1.180(6) | C4   | C3   | 1.372(5) |
| C4   | C5   | 1.376(5) | C4   | H4A  | 0.9300   |
| C3   | H3A  | 0.9300   | C5   | H5A  | 0.9300   |

Table 4. Bond Angles(°)

| atom | atom | atom | angle      | atom | atom | atom | angle      |
|------|------|------|------------|------|------|------|------------|
| O1   | P1   | C1   | 112.9(2)   | O1   | P1   | C21  | 119.47(19) |
| C1   | P1   | C21  | 106.89(19) | O1   | P1   | C17  | 117.51(19) |
| C1   | P1   | C17  | 107.8(2)   | C21  | P1   | C17  | 89.6(2)    |
| C33  | C34  | C29  | 116.7(5)   | C33  | C34  | C28  | 122.0(5)   |
| C29  | C34  | C28  | 121.3(5)   | F8   | C19  | C18  | 123.6(4)   |
| F8   | C19  | C20  | 116.4(5)   | C18  | C19  | C20  | 120.1(5)   |
| C19  | C18  | C17  | 116.5(5)   | C19  | C18  | C26  | 129.9(5)   |
| C17  | C18  | C26  | 113.6(5)   | C8   | C7   | C1   | 117.2(5)   |
| C8   | C7   | C13  | 121.6(5)   | C12  | C7   | C13  | 121.2(5)   |
| C16  | C17  | C18  | 122.3(5)   | C16  | C17  | P1   | 126.2(4)   |
| C18  | C17  | P1   | 111.5(4)   | F2   | C9   | C8   | 122.4(5)   |
| F2   | C9   | C10  | 118.9(5)   | C8   | C9   | C10  | 118.7(5)   |
| C20  | C15  | C16  | 115.1(5)   | C20  | C15  | C14  | 121.1(5)   |
| C16  | C15  | C14  | 123.8(5)   | C25  | C26  | C21  | 117.5(5)   |
| C25  | C26  | C18  | 131.3(5)   | C21  | C26  | C18  | 111.1(4)   |
| F3   | C10  | C11  | 121.4(5)   | F3   | C10  | C9   | 118.9(5)   |
| C11  | C10  | C9   | 119.7(5)   | F5   | C12  | C11  | 119.5(5)   |
| F5   | C12  | C7   | 119.5(5)   | C11  | C12  | C7   | 121.0(5)   |
| C6   | C1   | C2   | 119.0(4)   | C6   | C1   | P1   | 124.1(4)   |
| C2   | C1   | P1   | 116.9(3)   | F9   | C25  | C26  | 122.1(5)   |
| F9   | C25  | C24  | 116.3(4)   | C26  | C25  | C24  | 121.5(5)   |
| F16  | C33  | C32  | 118.5(5)   | F16  | C33  | C34  | 119.0(5)   |
| C32  | C33  | C34  | 122.5(5)   | C24  | C23  | C22  | 114.2(5)   |
| C24  | C23  | C27  | 122.0(5)   | C22  | C23  | C27  | 123.7(5)   |
| C22  | C21  | C26  | 119.5(4)   | C22  | C21  | P1   | 126.7(4)   |
| C26  | C21  | P1   | 113.7(4)   | C5   | C6   | C1   | 120.9(4)   |
| C5   | C6   | H6A  | 119.5      | C1   | C6   | H6A  | 119.5      |
| C29  | C30  | F13  | 121.4(5)   | C29  | C30  | C31  | 119.7(5)   |
| F13  | C30  | C31  | 118.9(5)   | F7   | C20  | C15  | 119.2(5)   |
| F7   | C20  | C19  | 117.3(5)   | C15  | C20  | C19  | 123.4(5)   |
| F10  | C24  | C25  | 118.2(5)   | F10  | C24  | C23  | 119.1(5)   |
| C25  | C24  | C23  | 122.5(5)   | F14  | C31  | C32  | 120.0(5)   |
| F14  | C31  | C30  | 120.4(5)   | C32  | C31  | C30  | 119.6(5)   |
| C1   | C2   | C3   | 120.5(4)   | C1   | C2   | H2A  | 119.8      |
| C3   | C2   | H2A  | 119.8      | F15  | C32  | C33  | 120.9(5)   |
| F15  | C32  | C31  | 119.5(5)   | C33  | C32  | C31  | 119.5(5)   |
| F4   | C11  | C12  | 119.8(5)   | F4   | C11  | C10  | 119.2(5)   |
| C12  | C11  | C10  | 120.9(5)   | C13  | C14  | C15  | 177.8(5)   |
| F12  | C29  | C30  | 118.3(5)   | F12  | C29  | C34  | 119.8(5)   |
| C30  | C29  | C34  | 121.9(5)   | F1   | C8   | C9   | 118.3(5)   |
| F1   | C8   | C7   | 119.3(5)   | C9   | C8   | C7   | 122.4(5)   |
| C17  | C16  | F6   | 121.1(5)   | C17  | C16  | C15  | 122.4(4)   |
| F6   | C16  | C15  | 116.6(5)   | C27  | C28  | C34  | 179.2(6)   |
| C3   | C4   | C5   | 119.9(4)   | C3   | C4   | H4A  | 120.0      |
| C5   | C4   | H4A  | 120.0      | C4   | C3   | C2   | 119.9(4)   |
| C4   | C3   | H3A  | 120.1      | C2   | C3   | H3A  | 120.1      |
| C14  | C13  | C7   | 178.6(6)   | C28  | C27  | C23  | 176.3(6)   |
| C21  | C22  | F11  | 119.7(4)   | C21  | C22  | C23  | 124.6(5)   |
| F11  | C22  | C23  | 115.6(5)   | C6   | C5   | C4   | 119.8(4)   |
| C6   | C5   | H5A  | 120.1      | C4   | C5   | H5A  | 120.1      |



Supplementary Material (ESI) for Chemical Communications  
 This journal is (c) The Royal Society of Chemistry 2008

Table 5. Torsion Angles(°)

| atom | atom | atom | atom | angle     | atom | atom | atom | atom | angle     |
|------|------|------|------|-----------|------|------|------|------|-----------|
| F8   | C19  | C18  | C17  | 175.8(4)  | C20  | C19  | C18  | C17  | -4.1(6)   |
| F8   | C19  | C18  | C26  | -6.4(7)   | C20  | C19  | C18  | C26  | 173.7(4)  |
| C19  | C18  | C17  | C16  | 4.3(6)    | C26  | C18  | C17  | C16  | 173.9(4)  |
| C19  | C18  | C17  | P1   | -176.5(3) | C26  | C18  | C17  | P1   | 5.4(4)    |
| O1   | P1   | C17  | C16  | 49.7(4)   | C1   | P1   | C17  | C16  | -79.2(4)  |
| C21  | P1   | C17  | C16  | 173.2(4)  | O1   | P1   | C17  | C18  | -129.5(3) |
| C1   | P1   | C17  | C18  | 101.6(3)  | C21  | P1   | C17  | C18  | -6.0(3)   |
| C19  | C18  | C26  | C25  | 1.1(8)    | C17  | C18  | C26  | C25  | 178.9(4)  |
| C19  | C18  | C26  | C21  | -179.2(4) | C17  | C18  | C26  | C21  | -1.4(5)   |
| F2   | C9   | C10  | F3   | 0.8(6)    | C8   | C9   | C10  | F3   | -179.8(4) |
| F2   | C9   | C10  | C11  | 178.9(4)  | C8   | C9   | C10  | C11  | -1.7(7)   |
| C8   | C7   | C12  | F5   | -178.4(3) | C13  | C7   | C12  | F5   | 1.7(7)    |
| C8   | C7   | C12  | C11  | 2.5(7)    | C13  | C7   | C12  | C11  | -177.4(4) |
| O1   | P1   | C1   | C6   | -178.0(3) | C21  | P1   | C1   | C6   | 48.7(4)   |
| C17  | P1   | C1   | C6   | -46.5(4)  | O1   | P1   | C1   | C2   | 3.4(4)    |
| C21  | P1   | C1   | C2   | -129.9(4) | C17  | P1   | C1   | C2   | 134.9(4)  |
| C21  | C26  | C25  | F9   | -177.8(4) | C18  | C26  | C25  | F9   | 1.9(7)    |
| C21  | C26  | C25  | C24  | -0.3(6)   | C18  | C26  | C25  | C24  | 179.4(4)  |
| C29  | C34  | C33  | F16  | -179.5(4) | C28  | C34  | C33  | F16  | -0.1(6)   |
| C29  | C34  | C33  | C32  | 2.0(7)    | C28  | C34  | C33  | C32  | -178.6(4) |
| C25  | C26  | C21  | C22  | -1.2(6)   | C18  | C26  | C21  | C22  | 179.0(4)  |
| C25  | C26  | C21  | P1   | 176.4(3)  | C18  | C26  | C21  | P1   | -3.4(4)   |
| O1   | P1   | C21  | C22  | -55.5(4)  | C1   | P1   | C21  | C22  | 74.2(4)   |
| C17  | P1   | C21  | C22  | -177.3(4) | O1   | P1   | C21  | C26  | 127.2(3)  |
| C1   | P1   | C21  | C26  | -103.2(3) | C17  | P1   | C21  | C26  | 5.4(3)    |
| C2   | C1   | C6   | C5   | -1.9(7)   | P1   | C1   | C6   | C5   | 179.6(3)  |
| C16  | C15  | C20  | F7   | -178.7(4) | C14  | C15  | C20  | F7   | 1.9(6)    |
| C16  | C15  | C20  | C19  | 4.1(7)    | C14  | C15  | C20  | C19  | -175.2(4) |
| F8   | C19  | C20  | F7   | 2.8(6)    | C18  | C19  | C20  | F7   | -177.3(4) |
| F8   | C19  | C20  | C15  | 180.0(4)  | C18  | C19  | C20  | C15  | -0.1(7)   |
| F9   | C25  | C24  | F10  | 1.5(6)    | C26  | C25  | C24  | F10  | -176.1(4) |
| F9   | C25  | C24  | C23  | 177.5(4)  | C26  | C25  | C24  | C23  | -0.1(7)   |
| C22  | C23  | C24  | F10  | 177.9(3)  | C27  | C23  | C24  | F10  | 0.8(7)    |
| C22  | C23  | C24  | C25  | 1.9(7)    | C27  | C23  | C24  | C25  | -175.2(4) |
| C29  | C30  | C31  | F14  | 179.6(4)  | F13  | C30  | C31  | F14  | 1.7(7)    |
| C29  | C30  | C31  | C32  | -0.9(7)   | F13  | C30  | C31  | C32  | -178.8(4) |
| C6   | C1   | C2   | C3   | 1.0(7)    | P1   | C1   | C2   | C3   | 179.7(3)  |
| F16  | C33  | C32  | F15  | -0.1(7)   | C34  | C33  | C32  | F15  | 178.4(4)  |
| F16  | C33  | C32  | C31  | 179.3(4)  | C34  | C33  | C32  | C31  | -2.2(7)   |
| F14  | C31  | C32  | F15  | 0.5(7)    | C30  | C31  | C32  | F15  | -179.0(4) |
| F14  | C31  | C32  | C33  | -178.9(4) | C30  | C31  | C32  | C33  | 1.6(7)    |
| F5   | C12  | C11  | F4   | 0.7(7)    | C7   | C12  | C11  | F4   | 179.8(4)  |
| F5   | C12  | C11  | C10  | 178.6(4)  | C7   | C12  | C11  | C10  | -2.3(7)   |
| F3   | C10  | C11  | F4   | -2.2(7)   | C9   | C10  | C11  | F4   | 179.8(4)  |
| F3   | C10  | C11  | C12  | 179.9(4)  | C9   | C10  | C11  | C12  | 1.8(7)    |
| C20  | C15  | C14  | C13  | 38(15)    | C16  | C15  | C14  | C13  | -141(15)  |
| F13  | C30  | C29  | F12  | -1.7(7)   | C31  | C30  | C29  | F12  | -179.6(4) |
| F13  | C30  | C29  | C34  | 178.7(4)  | C31  | C30  | C29  | C34  | 0.7(7)    |
| C33  | C34  | C29  | F12  | 179.0(4)  | C28  | C34  | C29  | F12  | -0.4(6)   |
| C33  | C34  | C29  | C30  | -1.3(7)   | C28  | C34  | C29  | C30  | 179.3(4)  |
| F2   | C9   | C8   | F1   | -1.4(6)   | C10  | C9   | C8   | F1   | 179.2(4)  |
| F2   | C9   | C8   | C7   | -178.6(4) | C10  | C9   | C8   | C7   | 2.1(7)    |
| C12  | C7   | C8   | F1   | -179.6(4) | C13  | C7   | C8   | F1   | 0.3(6)    |
| C12  | C7   | C8   | C9   | -2.4(7)   | C13  | C7   | C8   | C9   | 177.5(4)  |

Supplementary Material (ESI) for Chemical Communications  
This journal is (c) The Royal Society of Chemistry 2008

|     |     |     |     |           |     |     |     |     |           |
|-----|-----|-----|-----|-----------|-----|-----|-----|-----|-----------|
| C18 | C17 | C16 | F6  | 178.2(3)  | P1  | C17 | C16 | F6  | -1.0(6)   |
| C18 | C17 | C16 | C15 | -0.2(7)   | P1  | C17 | C16 | C15 | -179.3(3) |
| C20 | C15 | C16 | C17 | -4.0(7)   | C14 | C15 | C16 | C17 | 175.4(4)  |
| C20 | C15 | C16 | F6  | 177.6(3)  | C14 | C15 | C16 | F6  | -3.0(6)   |
| C33 | C34 | C28 | C27 | 47(44)    | C29 | C34 | C28 | C27 | -134(44)  |
| C5  | C4  | C3  | C2  | -1.4(7)   | C1  | C2  | C3  | C4  | 0.6(7)    |
| C15 | C14 | C13 | C7  | -60(31)   | C8  | C7  | C13 | C14 | -163(100) |
| C12 | C7  | C13 | C14 | 17(24)    | C34 | C28 | C27 | C23 | -180(100) |
| C24 | C23 | C27 | C28 | 140(8)    | C22 | C23 | C27 | C28 | -37(9)    |
| C26 | C21 | C22 | F11 | 179.5(4)  | P1  | C21 | C22 | F11 | 2.3(6)    |
| C26 | C21 | C22 | C23 | 3.3(7)    | P1  | C21 | C22 | C23 | -173.9(3) |
| C24 | C23 | C22 | C21 | -3.6(7)   | C27 | C23 | C22 | C21 | 173.5(4)  |
| C24 | C23 | C22 | F11 | -179.9(4) | C27 | C23 | C22 | F11 | -2.9(6)   |
| C1  | C6  | C5  | C4  | 1.1(7)    | C3  | C4  | C5  | C6  | 0.6(7)    |

Compound 3a

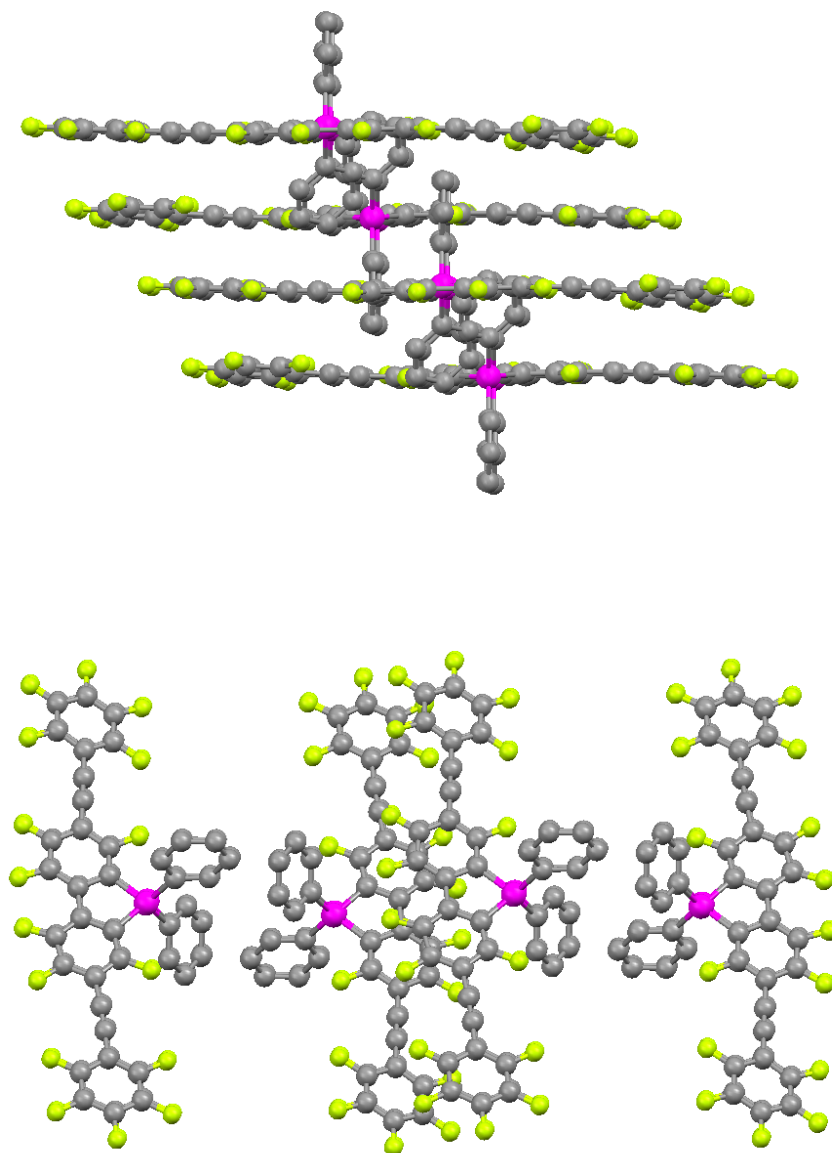

**Figure S12.** Additional views for the Crystal structure for germafluorene **3a**, illustrating the bi-directional nature of the crystal packing. Hydrogen atoms have been removed for clarity.

Data Collection

A fragment of a colorless block-like crystal of C<sub>40</sub> H<sub>10</sub> F<sub>16</sub> Ge having approximate dimensions of .17 x .07 x .05 mm was mounted on a glass fiber using Paratone N hydrocarbon oil. All measurements were made on a CCD area detector<sup>10</sup> CCD area detector with graphite monochromated MoKradiation.

Cell constants and an orientation matrix, obtained from a least-squares refinement using the measured positions of 1247 centered reflections with  $I > 10\sigma(I)$  in the range  $2.52 < \theta < 19.89^\circ$  corresponded to a primitive Triclinic cell with dimensions:

$$\begin{array}{ll} a = 7.922(2) \text{ \AA} & \alpha = 111.63(3)^\circ \\ b = 15.049(3) \text{ \AA} & \beta = 102.29(3)^\circ \\ c = 15.823(3) \text{ \AA} & \gamma = 101.99(3)^\circ \\ V = 8876(1) \text{ \AA}^3 & \end{array}$$

For  $Z = 2$  and  $F.W. = 867.07$ , the calculated density is  $1.771 \text{ g/cm}^3$ .

Analysis of the systematic absences allowed the space group to be uniquely determined to be:

P-1

The data were collected at a temperature of  $118(2) \text{ K}$ . Frames corresponding to an arbitrary hemisphere of data were collected using  $\omega$  scans of  $0.3^\circ$  counted for a total of 30 seconds per frame.

#### Data Reduction

Data were integrated by the program SAINT<sup>11</sup> to a maximum  $\theta$  value of  $20.81^\circ$ . The data were corrected for Lorentz and polarization effects. Data were analyzed for agreement and possible absorption using XPREP<sup>12</sup>. An empirical absorption correction based on comparison of redundant and equivalent reflections was applied using SADABS<sup>13</sup>. ( $T_{\text{max}} = 0.950$ ,  $T_{\text{min}} = 0.910$ ). Of the 9156 reflections that were collected, 3384 were unique ( $R_{\text{int}} = 0.1023$ ); equivalent reflections were merged. No decay correction was applied.

#### Structure Solution and Refinement

The structure was solved by direct methods<sup>1</sup> and expanded using Fourier techniques<sup>2</sup>. Non-hydrogen atoms were refined anisotropically. Hydrogen atoms were included but not refined. The final cycle of full-matrix least-squares refinement<sup>3</sup> was based on 3384 reflections (all data) and 514 variable parameters and converged (largest parameter shift was 0.001 times its esd) with conventional unweighted and weighted agreement factors of:

$$R_1 = \sum ||F_o| - |F_c|| / \sum |F_o| = 0.0344 \text{ for } 1788 \text{ data with } I > 2\sigma(I)$$

$$wR_2 = [(\sum w (|F_o|^2 - |F_c|^2)^2) / \sum w |F_o|^2]^{1/2} = 0.0545$$

The standard deviation of an observation of unit weight<sup>4</sup> was 0.543. The weighting scheme was based on counting statistics and included a factor to downweight the intense reflections. The maximum and minimum peaks on the final difference Fourier map corresponded to 0.358 and  $-0.256 \text{ e}^-/\text{\AA}^3$ , respectively.

Neutral atom scattering factors were taken from Cromer and Waber<sup>5</sup>. Anomalous dispersion effects were included in  $F_{\text{calc}}$ <sup>6</sup>; the values for  $\Delta f'$  and  $\Delta f''$  were those of Creagh and McAuley<sup>7</sup>. The values for the mass attenuation coefficients are those of Creagh and Hubbel<sup>8</sup>. All calculations were performed using the SHELXTL<sup>9</sup> crystallographic software package of Bruker Analytical X-ray Systems Inc.

#### *References*

Supplementary Material (ESI) for Chemical Communications  
This journal is (c) The Royal Society of Chemistry 2008

(1) XS: Program for the Solution of X-ray Crystal Structures, Part of the SHELXTL Crystal Structure Determination Package, Bruker Analytical X-ray Systems Inc.: Madison, WI, (1995-99)

(2) XL: Program for the Refinement of X-ray Crystal Structures, Part of the SHELXTL Crystal Structure Determination Package, Bruker Analytical X-ray Systems Inc.: Madison, WI, (1995-99)

(3) Least-Squares:

$$\text{Function minimized } \sum w (|F_o|^2 - |F_c|^2)^2$$

(4) Standard deviation of an observation of unit weight:

$$[\sum w (|F_o|^2 - |F_c|^2)^2 / (N_o - N_v)]^{1/2}$$

where  $N_o$  = number of observations  
 $N_v$  = number of variables

(5) Cromer, D. T. & Waber, J. T.; "International Tables for X-ray Crystallography", Vol. IV, The Kynoch Press, Birmingham, England, Table 2.2 A (1974).

(6) Ibers, J. A. & Hamilton, W. C.; Acta Crystallogr., 17, 781 (1964).

(7) Creagh, D. C. & McAuley, W.J. ; "International Tables for Crystallography", Vol C, (A.J.C. Wilson, ed.), Kluwer Academic Publishers, Boston, Table 4.2.6.8, pages 219-222 (1992).

(8) Creagh, D. C. & Hubbell, J.H.; "International Tables for Crystallography", Vol C, (A.J.C. Wilson, ed.), Kluwer Academic Publishers, Boston, Table 4.2.4.3, pages 200-206 (1992).

(9) XP: Molecular Graphics program. Part of the SHELXTL Structure Determination Package. Bruker Analytical X-ray Systems Inc.: Madison, WI, (1995-99)

(10) SMART: Area-Detector Software Package, Bruker Analytical X-ray Systems, Inc.: Madison, WI, (1995-99)

(11) SAINT: SAX Area-Detector Integration Program, V5.04; Siemens Industrial Automation, Inc.: Madison, WI, (1995)

(12) XPREP:(v 5.03) Part of the SHELXTL Crystal Structure Determination Package, Siemens Industrial Automation, Inc.: Madison, WI, (1995)

(13) SADABS: Siemens Area Detector ABSorption correction program, George Sheldrick, (1996).  
Advance copy, private communication.

## EXPERIMENTAL DETAILS

### A. Crystal Data

|                      |                                                                                                                                               |
|----------------------|-----------------------------------------------------------------------------------------------------------------------------------------------|
| Empirical Formula    | C <sub>40</sub> H <sub>10</sub> F <sub>16</sub> Ge                                                                                            |
| Formula Weight       | 867.07                                                                                                                                        |
| Crystal Color, Habit | colorless, block                                                                                                                              |
| Crystal Dimensions   | .17 x .07 x .05 mm                                                                                                                            |
| Crystal System       | Triclinic                                                                                                                                     |
| Lattice Type         | primitive                                                                                                                                     |
| Lattice Parameters   | a = 7.922(2) Å<br>b = 15.049(3) Å<br>c = 15.823(3) Å<br>α = 111.63(3) °<br>β = 102.29(3) °<br>γ = 101.99(3) °<br>V = 1626.1(8) Å <sup>3</sup> |
| Space Group          | P-1                                                                                                                                           |
| Z value              | 2                                                                                                                                             |
| D <sub>calc</sub>    | 1.771 g/cm <sup>3</sup>                                                                                                                       |
| F <sub>000</sub>     | 852                                                                                                                                           |
| μ (MoK)              | 1.07 cm <sup>-1</sup>                                                                                                                         |

### B. Intensity Measurements

|                             |                                                                                            |
|-----------------------------|--------------------------------------------------------------------------------------------|
| Diffractometer              | CCD area detector                                                                          |
| Radiation                   | MoK(λ = 0.71073 Å)<br>graphite monochromated                                               |
| Detector Position           | 60.00 mm                                                                                   |
| Exposure Time               | 30 seconds per frame.                                                                      |
| Scan Type                   | ω (0.3 degrees per frame)                                                                  |
| θ <sub>max</sub>            | 20.81°                                                                                     |
| No. of Reflections Measured | Total: 9156<br>Unique: 3384 (R <sub>int</sub> = 0.1023)                                    |
| Corrections                 | Lorentz-polarization<br>Absorption (T <sub>max</sub> = 0.950,<br>T <sub>min</sub> = 0.910) |

### C. Structure Solution and Refinement

|                                      |                                                                               |
|--------------------------------------|-------------------------------------------------------------------------------|
| Structure Solution                   | direct (SHELXS-97 (Sheldrick, 1990))                                          |
| Refinement                           | Full-matrix least-squares                                                     |
| Function Minimized                   | $\sum w( F_o ^2 -  F_c ^2)^2$                                                 |
| Least Squares Weighting scheme       | $w = 1/[\sigma^2(F_o^2) + (qP)^2 + 0.000P]$<br>where $P = [F_o^2 + 2F_c^2]/3$ |
| Anomalous Dispersion                 | All non-hydrogen atoms                                                        |
| No. Observations (I > 2.00σ(I))      | 1788                                                                          |
| No. Variables                        | 514                                                                           |
| Residuals: R; wR <sub>2</sub> ; Rall | 0.0344; 0.0545; 0.0802                                                        |
| Goodness of Fit Indicator            | 0.543                                                                         |
| Max Shift/Error in Final Cycle       | 0.001                                                                         |
| Maximum peak in Final Diff. Map      | 0.358 e <sup>-</sup> /Å <sup>3</sup>                                          |
| Minimum peak in Final Diff. Map      | -0.256 e <sup>-</sup> /Å <sup>3</sup>                                         |

Table 1. Atomic coordinates and  $U_{\text{iso}}/U_{\text{eq}}$  and occupancy

| atom | x          | y          | z          | $U_{\text{eq}}$ | Occupancy |
|------|------------|------------|------------|-----------------|-----------|
| Ge1  | -0.7346(1) | -0.2349(1) | -0.4748(1) | 0.035(1)        | 1         |
| F1   | -1.5853(4) | -0.4887(2) | -0.9267(2) | 0.054(1)        | 1         |
| F2   | -1.8931(5) | -0.5692(2) | -1.0790(2) | 0.064(1)        | 1         |
| F3   | -2.0270(5) | -0.4491(2) | -1.1464(2) | 0.067(1)        | 1         |
| F4   | -1.8509(4) | -0.2469(2) | -1.0646(2) | 0.055(1)        | 1         |
| F5   | -1.5470(4) | -0.1665(2) | -0.9125(2) | 0.049(1)        | 1         |
| F6   | -1.0833(4) | -0.3331(2) | -0.6674(2) | 0.045(1)        | 1         |
| F7   | -1.1011(4) | -0.0321(2) | -0.6893(2) | 0.046(1)        | 1         |
| F8   | -0.8166(4) | 0.0720(2)  | -0.5391(2) | 0.045(1)        | 1         |
| F9   | -0.5546(4) | 0.1478(2)  | -0.3947(2) | 0.045(1)        | 1         |
| F10  | -0.2774(4) | 0.2016(2)  | -0.2441(2) | 0.044(1)        | 1         |
| F12  | 0.1273(4)  | -0.0419(2) | -0.0689(2) | 0.057(1)        | 1         |
| F13  | 0.4313(4)  | 0.0198(3)  | 0.0806(2)  | 0.065(1)        | 1         |
| F14  | 0.6045(5)  | 0.2192(3)  | 0.1905(2)  | 0.076(1)        | 1         |
| F15  | 0.4728(4)  | 0.3567(2)  | 0.1522(2)  | 0.070(1)        | 1         |
| F16  | 0.1686(4)  | 0.2956(2)  | 0.0035(2)  | 0.056(1)        | 1         |
| C1   | -0.6172(7) | -0.3259(4) | -0.5413(4) | 0.032(2)        | 1         |
| C2   | -0.4829(9) | -0.3489(4) | -0.4907(4) | 0.057(2)        | 1         |
| C3   | -0.3938(9) | -0.4112(5) | -0.5368(5) | 0.069(2)        | 1         |
| C4   | -0.4340(8) | -0.4518(4) | -0.6343(5) | 0.052(2)        | 1         |
| C5   | -0.5717(9) | -0.4307(4) | -0.6868(4) | 0.048(2)        | 1         |
| C6   | -0.6594(8) | -0.3669(4) | -0.6397(4) | 0.044(2)        | 1         |
| C7   | -0.8698(7) | -0.2833(4) | -0.4049(3) | 0.033(2)        | 1         |
| C8   | -0.9567(8) | -0.2227(4) | -0.3500(4) | 0.043(2)        | 1         |
| C9   | -1.0523(8) | -0.2545(5) | -0.2968(4) | 0.047(2)        | 1         |
| C10  | -1.0657(8) | -0.3486(5) | -0.3002(4) | 0.045(2)        | 1         |
| C11  | -0.9829(9) | -0.4087(5) | -0.3522(4) | 0.048(2)        | 1         |
| C12  | -0.8861(7) | -0.3764(4) | -0.4042(4) | 0.038(2)        | 1         |
| C13  | -1.6501(9) | -0.4259(5) | -0.9595(4) | 0.042(2)        | 1         |
| C14  | -1.8037(9) | -0.4695(5) | -1.0371(4) | 0.042(2)        | 1         |
| C15  | -1.8739(8) | -0.4087(5) | -1.0712(4) | 0.041(2)        | 1         |
| C16  | -1.7862(9) | -0.3079(5) | -1.0308(4) | 0.039(2)        | 1         |
| C17  | -1.6316(8) | -0.2655(4) | -0.9534(4) | 0.032(2)        | 1         |
| C18  | -1.5545(8) | -0.3241(5) | -0.9147(4) | 0.035(2)        | 1         |
| C19  | -1.3946(9) | -0.2804(4) | -0.8350(4) | 0.041(2)        | 1         |
| C20  | -1.2609(8) | -0.2392(4) | -0.7664(4) | 0.036(2)        | 1         |
| C21  | -1.1031(7) | -0.1862(4) | -0.6836(4) | 0.033(2)        | 1         |
| C22  | -1.0136(8) | -0.2316(4) | -0.6328(4) | 0.035(2)        | 1         |
| C23  | -0.8639(8) | -0.1793(4) | -0.5516(4) | 0.031(2)        | 1         |
| C24  | -0.7894(7) | -0.0740(4) | -0.5149(4) | 0.031(1)        | 1         |
| C25  | -0.8757(8) | -0.0275(4) | -0.5651(4) | 0.031(2)        | 1         |
| C26  | -1.0253(8) | -0.0837(5) | -0.6462(4) | 0.032(2)        | 1         |
| C27  | -0.6267(7) | -0.0279(4) | -0.4266(4) | 0.027(1)        | 1         |
| C28  | -0.5744(7) | -0.0988(4) | -0.3947(4) | 0.031(2)        | 1         |
| C29  | -0.4276(8) | -0.0643(4) | -0.3152(4) | 0.032(2)        | 1         |
| C30  | -0.3196(8) | 0.0353(4)  | -0.2602(4) | 0.032(2)        | 1         |
| C31  | -0.3755(8) | 0.1030(4)  | -0.2918(4) | 0.032(2)        | 1         |
| C32  | -0.5214(8) | 0.0727(4)  | -0.3728(4) | 0.032(2)        | 1         |
| C33  | -0.1608(8) | 0.0675(4)  | -0.1793(4) | 0.037(2)        | 1         |
| C34  | -0.0256(8) | 0.0934(4)  | -0.1149(4) | 0.034(2)        | 1         |
| C35  | 0.1378(7)  | 0.1256(4)  | -0.0368(4) | 0.030(2)        | 1         |
| C36  | 0.2108(8)  | 0.0575(4)  | -0.0144(4) | 0.037(2)        | 1         |
| C37  | 0.3642(9)  | 0.0881(5)  | 0.0617(5)  | 0.042(2)        | 1         |

Supplementary Material (ESI) for Chemical Communications  
 This journal is (c) The Royal Society of Chemistry 2008

|     |            |            |            |          |   |
|-----|------------|------------|------------|----------|---|
| C38 | 0.4518(8)  | 0.1873(6)  | 0.1164(4)  | 0.045(2) | 1 |
| C39 | 0.3848(8)  | 0.2586(5)  | 0.0987(4)  | 0.043(2) | 1 |
| C40 | 0.2300(8)  | 0.2253(4)  | 0.0213(4)  | 0.035(2) | 1 |
| F11 | -0.3788(4) | -0.1321(2) | -0.2858(2) | 0.044(1) | 1 |

$U_{eq}$  is defined as one third of the orthogonalized  $U_{ij}$  tensor

Table 2. Anisotropic Displacement Parameters

| atom | $U_{11}$ | $U_{22}$ | $U_{33}$ | $U_{12}$  | $U_{13}$  | $U_{23}$ |
|------|----------|----------|----------|-----------|-----------|----------|
| Ge1  | 0.035(1) | 0.038(1) | 0.037(1) | 0.019(1)  | 0.007(1)  | 0.017(1) |
| F1   | 0.065(3) | 0.058(2) | 0.055(2) | 0.035(2)  | 0.016(2)  | 0.032(2) |
| F2   | 0.070(3) | 0.049(2) | 0.067(3) | 0.028(2)  | 0.010(2)  | 0.013(2) |
| F3   | 0.061(3) | 0.072(3) | 0.054(2) | 0.027(2)  | -0.005(2) | 0.017(2) |
| F4   | 0.054(3) | 0.067(2) | 0.055(2) | 0.037(2)  | 0.008(2)  | 0.032(2) |
| F5   | 0.055(2) | 0.047(2) | 0.048(2) | 0.023(2)  | 0.016(2)  | 0.023(2) |
| F6   | 0.042(2) | 0.041(2) | 0.043(2) | 0.017(2)  | -0.001(2) | 0.011(2) |
| F7   | 0.052(2) | 0.063(2) | 0.044(2) | 0.033(2)  | 0.020(2)  | 0.037(2) |
| F8   | 0.050(2) | 0.044(2) | 0.053(2) | 0.029(2)  | 0.019(2)  | 0.022(2) |
| F9   | 0.048(2) | 0.039(2) | 0.052(2) | 0.026(2)  | 0.012(2)  | 0.015(2) |
| F10  | 0.044(2) | 0.039(2) | 0.048(2) | 0.018(2)  | 0.012(2)  | 0.013(2) |
| F12  | 0.061(3) | 0.045(2) | 0.072(3) | 0.031(2)  | 0.020(2)  | 0.020(2) |
| F13  | 0.066(3) | 0.082(3) | 0.086(3) | 0.063(2)  | 0.029(2)  | 0.044(2) |
| F14  | 0.053(3) | 0.111(3) | 0.054(2) | 0.039(2)  | -0.002(2) | 0.020(2) |
| F15  | 0.065(3) | 0.047(2) | 0.063(2) | 0.003(2)  | 0.008(2)  | 0.002(2) |
| F16  | 0.056(3) | 0.042(2) | 0.072(2) | 0.024(2)  | 0.016(2)  | 0.023(2) |
| C1   | 0.034(4) | 0.036(4) | 0.028(4) | 0.013(3)  | 0.010(3)  | 0.018(3) |
| C2   | 0.066(5) | 0.067(5) | 0.028(4) | 0.004(4)  | 0.008(4)  | 0.040(4) |
| C3   | 0.059(5) | 0.074(5) | 0.048(5) | -0.004(4) | 0.000(4)  | 0.044(4) |
| C4   | 0.040(5) | 0.054(4) | 0.054(5) | 0.011(4)  | 0.017(4)  | 0.021(4) |
| C5   | 0.063(5) | 0.043(4) | 0.036(4) | 0.011(4)  | 0.017(4)  | 0.023(4) |
| C6   | 0.053(5) | 0.035(4) | 0.047(5) | 0.021(4)  | 0.013(4)  | 0.017(4) |
| C7   | 0.040(4) | 0.033(4) | 0.026(4) | 0.011(3)  | 0.009(3)  | 0.016(3) |
| C8   | 0.043(5) | 0.042(4) | 0.050(4) | 0.029(4)  | 0.008(4)  | 0.013(4) |
| C9   | 0.051(5) | 0.059(5) | 0.041(4) | 0.027(4)  | 0.018(3)  | 0.023(4) |
| C10  | 0.032(4) | 0.062(5) | 0.047(4) | 0.039(4)  | 0.008(3)  | 0.005(4) |
| C11  | 0.053(5) | 0.042(4) | 0.056(5) | 0.027(4)  | 0.017(4)  | 0.019(4) |
| C12  | 0.037(4) | 0.036(4) | 0.043(4) | 0.020(3)  | 0.009(3)  | 0.017(3) |
| C13  | 0.046(5) | 0.069(5) | 0.035(4) | 0.038(4)  | 0.015(4)  | 0.035(4) |
| C14  | 0.047(5) | 0.042(5) | 0.043(4) | 0.023(4)  | 0.014(4)  | 0.019(4) |
| C15  | 0.030(4) | 0.052(5) | 0.026(4) | 0.014(4)  | -0.008(3) | 0.005(4) |
| C16  | 0.044(5) | 0.057(5) | 0.036(4) | 0.031(4)  | 0.013(4)  | 0.032(4) |
| C17  | 0.041(4) | 0.029(4) | 0.037(4) | 0.018(4)  | 0.018(4)  | 0.020(4) |
| C18  | 0.029(4) | 0.042(4) | 0.030(4) | 0.013(4)  | 0.005(3)  | 0.011(4) |
| C19  | 0.046(5) | 0.050(4) | 0.036(4) | 0.019(4)  | 0.021(4)  | 0.023(4) |
| C20  | 0.031(5) | 0.051(4) | 0.039(4) | 0.023(4)  | 0.017(4)  | 0.024(4) |
| C21  | 0.022(4) | 0.043(4) | 0.038(4) | 0.021(4)  | 0.011(3)  | 0.011(3) |
| C22  | 0.038(4) | 0.032(4) | 0.044(4) | 0.024(4)  | 0.017(4)  | 0.011(3) |
| C23  | 0.030(4) | 0.047(4) | 0.026(4) | 0.021(3)  | 0.012(3)  | 0.018(3) |
| C24  | 0.028(4) | 0.035(4) | 0.036(4) | 0.016(3)  | 0.015(3)  | 0.014(3) |
| C25  | 0.034(4) | 0.031(4) | 0.040(4) | 0.023(4)  | 0.017(3)  | 0.017(3) |
| C26  | 0.028(4) | 0.059(5) | 0.032(4) | 0.035(4)  | 0.012(3)  | 0.027(4) |
| C27  | 0.023(4) | 0.033(4) | 0.031(4) | 0.014(3)  | 0.017(3)  | 0.013(3) |
| C28  | 0.027(4) | 0.049(4) | 0.033(4) | 0.024(3)  | 0.016(3)  | 0.029(3) |



Supplementary Material (ESI) for Chemical Communications  
This journal is (c) The Royal Society of Chemistry 2008

|     |          |          |          |          |           |          |
|-----|----------|----------|----------|----------|-----------|----------|
| C29 | 0.038(4) | 0.034(4) | 0.041(4) | 0.023(4) | 0.023(4)  | 0.021(4) |
| C30 | 0.037(4) | 0.038(4) | 0.032(4) | 0.019(4) | 0.015(3)  | 0.017(4) |
| C31 | 0.029(4) | 0.027(4) | 0.035(4) | 0.009(3) | 0.019(3)  | 0.002(3) |
| C32 | 0.036(4) | 0.043(5) | 0.031(4) | 0.023(4) | 0.019(3)  | 0.022(4) |
| C33 | 0.037(5) | 0.040(4) | 0.035(4) | 0.013(3) | 0.015(4)  | 0.017(3) |
| C34 | 0.034(4) | 0.036(4) | 0.039(4) | 0.019(3) | 0.014(4)  | 0.013(3) |
| C35 | 0.032(4) | 0.028(4) | 0.034(4) | 0.015(4) | 0.013(3)  | 0.015(3) |
| C36 | 0.044(5) | 0.027(4) | 0.040(4) | 0.013(4) | 0.019(4)  | 0.006(4) |
| C37 | 0.041(5) | 0.057(5) | 0.054(5) | 0.042(5) | 0.023(4)  | 0.024(4) |
| C38 | 0.027(4) | 0.068(5) | 0.034(4) | 0.025(4) | -0.003(3) | 0.010(4) |
| C39 | 0.038(5) | 0.031(4) | 0.046(4) | 0.010(4) | 0.007(4)  | 0.001(4) |
| C40 | 0.047(5) | 0.032(4) | 0.042(4) | 0.022(4) | 0.015(4)  | 0.028(4) |
| F11 | 0.048(2) | 0.044(2) | 0.042(2) | 0.022(2) | 0.005(2)  | 0.021(2) |

The general temperature factor expression:

$$\exp(-2\sigma^2(a^2U_{11}h^2 + b^2U_{22}k^2 + c^2U_{33}l^2 + 2a*b*U_{12}hk + 2a*c*U_{13}hl + 2b*c*U_{23}kl))$$

Table 3. Bond Lengths(Å)

| atom | atom | distance | atom | atom | distance |
|------|------|----------|------|------|----------|
| Ge1  | C7   | 1.917(5) | Ge1  | C1   | 1.931(5) |
| Ge1  | C28  | 1.933(5) | Ge1  | C23  | 1.949(5) |
| F1   | C13  | 1.370(5) | F2   | C14  | 1.348(6) |
| F3   | C15  | 1.342(6) | F4   | C16  | 1.353(5) |
| F5   | C17  | 1.333(6) | F6   | C22  | 1.358(6) |
| F7   | C26  | 1.356(5) | F8   | C25  | 1.343(5) |
| F9   | C32  | 1.356(5) | F10  | C31  | 1.350(5) |
| F12  | C36  | 1.347(5) | F13  | C37  | 1.348(6) |
| F14  | C38  | 1.345(6) | F15  | C39  | 1.335(6) |
| F16  | C40  | 1.345(5) | C1   | C2   | 1.373(6) |
| C1   | C6   | 1.379(6) | C2   | C3   | 1.378(7) |
| C2   | H2A  | 0.9300   | C3   | C4   | 1.368(7) |
| C3   | H3A  | 0.9300   | C4   | C5   | 1.390(7) |
| C4   | H4A  | 0.9300   | C5   | C6   | 1.390(7) |
| C5   | H5A  | 0.9300   | C6   | H6A  | 0.9300   |
| C7   | C12  | 1.385(6) | C7   | C8   | 1.411(7) |
| C8   | C9   | 1.389(7) | C8   | H8A  | 0.9300   |
| C9   | C10  | 1.377(6) | C9   | H9A  | 0.9300   |
| C10  | C11  | 1.361(7) | C10  | H10A | 0.9300   |
| C11  | C12  | 1.381(7) | C11  | H11A | 0.9300   |
| C12  | H12A | 0.9300   | C13  | C14  | 1.363(7) |
| C13  | C18  | 1.383(7) | C14  | C15  | 1.373(7) |
| C15  | C16  | 1.361(7) | C16  | C17  | 1.366(7) |
| C17  | C18  | 1.411(7) | C18  | C19  | 1.410(7) |
| C19  | C20  | 1.195(7) | C20  | C21  | 1.426(7) |
| C21  | C26  | 1.373(7) | C21  | C22  | 1.406(6) |
| C22  | C23  | 1.376(7) | C23  | C24  | 1.408(7) |
| C24  | C25  | 1.402(6) | C24  | C27  | 1.498(7) |
| C25  | C26  | 1.379(7) | C27  | C32  | 1.392(7) |
| C27  | C28  | 1.433(6) | C28  | C29  | 1.360(6) |
| C29  | F11  | 1.358(5) | C29  | C30  | 1.388(7) |

Supplementary Material (ESI) for Chemical Communications  
 This journal is (c) The Royal Society of Chemistry 2008

|     |     |          |     |     |          |
|-----|-----|----------|-----|-----|----------|
| C30 | C31 | 1.397(6) | C30 | C33 | 1.435(7) |
| C31 | C32 | 1.381(7) | C33 | C34 | 1.187(7) |
| C34 | C35 | 1.434(7) | C35 | C40 | 1.368(7) |
| C35 | C36 | 1.392(7) | C36 | C37 | 1.368(7) |
| C37 | C38 | 1.349(7) | C38 | C39 | 1.381(7) |
| C39 | C40 | 1.382(7) |     |     |          |

Table 4. Bond Angles(°)

| atom | atom | atom | angle    | atom | atom | atom | angle    |
|------|------|------|----------|------|------|------|----------|
| C7   | Ge1  | C1   | 114.0(2) | C7   | Ge1  | C28  | 110.6(2) |
| C1   | Ge1  | C28  | 114.1(2) | C7   | Ge1  | C23  | 114.1(2) |
| C1   | Ge1  | C23  | 114.4(2) | C28  | Ge1  | C23  | 86.7(2)  |
| C2   | C1   | C6   | 117.8(5) | C2   | C1   | Ge1  | 120.4(4) |
| C6   | C1   | Ge1  | 121.8(4) | C1   | C2   | C3   | 121.1(5) |
| C1   | C2   | H2A  | 119.5    | C3   | C2   | H2A  | 119.5    |
| C4   | C3   | C2   | 121.5(6) | C4   | C3   | H3A  | 119.2    |
| C2   | C3   | H3A  | 119.2    | C3   | C4   | C5   | 118.2(6) |
| C3   | C4   | H4A  | 120.9    | C5   | C4   | H4A  | 120.9    |
| C4   | C5   | C6   | 119.9(5) | C4   | C5   | H5A  | 120.1    |
| C6   | C5   | H5A  | 120.1    | C1   | C6   | C5   | 21.4(5)  |
| C1   | C6   | H6A  | 119.3    | C5   | C6   | H6A  | 119.3    |
| C12  | C7   | C8   | 116.9(5) | C12  | C7   | Ge1  | 23.0(5)  |
| C8   | C7   | Ge1  | 120.1(4) | C9   | C8   | C7   | 21.5(5)  |
| C9   | C8   | H8A  | 119.2    | C7   | C8   | H8A  | 119.2    |
| C10  | C9   | C8   | 118.7(6) | C10  | C9   | H9A  | 120.6    |
| C8   | C9   | H9A  | 120.6    | C11  | C10  | C9   | 21.2(6)  |
| C11  | C10  | H10A | 119.4    | C9   | C10  | H10A | 119.4    |
| C10  | C11  | C12  | 120.0(6) | C10  | C11  | H11A | 120.0    |
| C12  | C11  | H11A | 120.0    | C11  | C12  | C7   | 21.7(5)  |
| C11  | C12  | H12A | 119.2    | C7   | C12  | H12A | 119.2    |
| C14  | C13  | F1   | 116.9(6) | C14  | C13  | C18  | 24.2(6)  |
| F1   | C13  | C18  | 118.8(5) | F2   | C14  | C13  | 22.5(6)  |
| F2   | C14  | C15  | 118.9(6) | C13  | C14  | C15  | 18.6(6)  |
| F3   | C15  | C16  | 119.8(6) | F3   | C15  | C14  | 20.0(6)  |
| C16  | C15  | C14  | 120.2(6) | F4   | C16  | C15  | 21.2(6)  |
| F4   | C16  | C17  | 118.4(6) | C15  | C16  | C17  | 20.4(5)  |
| F5   | C17  | C16  | 120.6(5) | F5   | C17  | C18  | 17.6(5)  |
| C16  | C17  | C18  | 121.8(5) | C13  | C18  | C19  | 23.6(6)  |
| C13  | C18  | C17  | 114.7(5) | C19  | C18  | C17  | 21.7(6)  |
| C20  | C19  | C18  | 177.0(6) | C19  | C20  | C21  | 177.5(6) |
| C26  | C21  | C22  | 113.9(5) | C26  | C21  | C20  | 21.6(5)  |
| C22  | C21  | C20  | 124.5(5) | F6   | C22  | C23  | 19.5(5)  |
| F6   | C22  | C21  | 116.5(5) | C23  | C22  | C21  | 24.0(5)  |
| C22  | C23  | C24  | 120.3(5) | C22  | C23  | Ge1  | 27.0(4)  |
| C24  | C23  | Ge1  | 112.7(4) | C25  | C24  | C23  | 16.6(5)  |
| C25  | C24  | C27  | 129.3(5) | C23  | C24  | C27  | 14.1(5)  |
| F8   | C25  | C26  | 116.6(5) | F8   | C25  | C24  | 22.7(5)  |
| C26  | C25  | C24  | 120.7(5) | F7   | C26  | C21  | 18.9(5)  |
| F7   | C26  | C25  | 116.5(5) | C21  | C26  | C25  | 24.5(5)  |
| C32  | C27  | C28  | 116.8(5) | C32  | C27  | C24  | 28.9(5)  |
| C28  | C27  | C24  | 114.3(5) | C29  | C28  | C27  | 118.8(5) |

Supplementary Material (ESI) for Chemical Communications  
 This journal is (c) The Royal Society of Chemistry 2008

|     |     |     |          |     |     |     |         |
|-----|-----|-----|----------|-----|-----|-----|---------|
| C29 | C28 | Ge1 | 129.0(4) | C27 | C28 | Ge1 | 12.2(4) |
| F11 | C29 | C28 | 118.3(5) | F11 | C29 | C30 | 15.8(5) |
| C28 | C29 | C30 | 125.9(5) | C29 | C30 | C31 | 14.1(5) |
| C29 | C30 | C33 | 123.8(5) | C31 | C30 | C33 | 22.0(5) |
| F10 | C31 | C32 | 118.4(5) | F10 | C31 | C30 | 18.7(5) |
| C32 | C31 | C30 | 122.8(5) | F9  | C32 | C31 | 15.2(5) |
| F9  | C32 | C27 | 123.2(5) | C31 | C32 | C27 | 21.6(5) |
| C34 | C33 | C30 | 177.4(6) | C33 | C34 | C35 | 79.5(6) |
| C40 | C35 | C36 | 115.9(5) | C40 | C35 | C34 | 21.9(5) |
| C36 | C35 | C34 | 122.1(5) | F12 | C36 | C37 | 18.8(6) |
| F12 | C36 | C35 | 119.0(5) | C37 | C36 | C35 | 22.2(5) |
| F13 | C37 | C38 | 119.7(6) | F13 | C37 | C36 | 20.4(6) |
| C38 | C37 | C36 | 119.8(6) | F14 | C38 | C37 | 20.9(6) |
| F14 | C38 | C39 | 118.4(6) | C37 | C38 | C39 | 20.7(6) |
| F15 | C39 | C38 | 120.6(6) | F15 | C39 | C40 | 21.3(6) |
| C38 | C39 | C40 | 118.0(5) | F16 | C40 | C35 | 19.3(5) |
| F16 | C40 | C39 | 117.4(5) | C35 | C40 | C39 | 23.2(5) |

Table 5. Torsion Angles(°)

| atom | atom | atom | atom | angle     | atom | atom | atom | atom | angle     |
|------|------|------|------|-----------|------|------|------|------|-----------|
| C7   | Ge1  | C1   | C2   | -64.0(5)  | C28  | Ge1  | C1   | C26  | 4.6(5)    |
| C23  | Ge1  | C1   | C2   | 162.2(5)  | C7   | Ge1  | C1   | C6   | 118.5(4)  |
| C28  | Ge1  | C1   | C6   | -113.0(5) | C23  | Ge1  | C1   | C6   | -15.4(5)  |
| C6   | C1   | C2   | C3   | -0.3(9)   | Ge1  | C1   | C2   | C3   | -177.9(5) |
| C1   | C2   | C3   | C4   | 0.7(10)   | C2   | C3   | C4   | C5   | -1.7(10)  |
| C3   | C4   | C5   | C6   | 2.4(9)    | C2   | C1   | C6   | C5   | 1.1(8)    |
| Ge1  | C1   | C6   | C5   | 178.7(4)  | C4   | C5   | C6   | C1   | -2.1(9)   |
| C1   | Ge1  | C7   | C12  | -1.7(5)   | C28  | Ge1  | C7   | C12  | -132.0(4) |
| C23  | Ge1  | C7   | C12  | 132.3(4)  | C1   | Ge1  | C7   | C8   | 177.6(4)  |
| C28  | Ge1  | C7   | C8   | 47.3(5)   | C23  | Ge1  | C7   | C8   | -48.5(5)  |
| C12  | C7   | C8   | C9   | 0.7(8)    | Ge1  | C7   | C8   | C9   | -178.6(4) |
| C7   | C8   | C9   | C10  | -1.7(8)   | C8   | C9   | C10  | C11  | 1.9(8)    |
| C9   | C10  | C11  | C12  | -1.2(9)   | C10  | C11  | C12  | C7   | 0.2(8)    |
| C8   | C7   | C12  | C11  | 0.0(8)    | Ge1  | C7   | C12  | C11  | 179.3(4)  |
| F1   | C13  | C14  | F2   | 2.0(9)    | C18  | C13  | C14  | F2   | 179.9(5)  |
| F1   | C13  | C14  | C15  | 179.2(5)  | C18  | C13  | C14  | C15  | -2.9(10)  |
| F2   | C14  | C15  | F3   | -1.4(8)   | C13  | C14  | C15  | F3   | -178.7(5) |
| F2   | C14  | C15  | C16  | -179.6(5) | C13  | C14  | C15  | C16  | 3.1(9)    |
| F3   | C15  | C16  | F4   | 0.4(9)    | C14  | C15  | C16  | F4   | 178.6(5)  |
| F3   | C15  | C16  | C17  | 179.1(5)  | C14  | C15  | C16  | C17  | -2.7(9)   |
| F4   | C16  | C17  | F5   | 0.0(8)    | C15  | C16  | C17  | F5   | -178.8(5) |
| F4   | C16  | C17  | C18  | -179.3(5) | C15  | C16  | C17  | C18  | 2.0(9)    |
| C14  | C13  | C18  | C19  | -179.3(6) | F1   | C13  | C18  | C19  | -1.4(9)   |
| C14  | C13  | C18  | C17  | 2.1(9)    | F1   | C13  | C18  | C17  | 180.0(4)  |
| F5   | C17  | C18  | C13  | 179.1(5)  | C16  | C17  | C18  | C13  | -1.6(8)   |
| F5   | C17  | C18  | C19  | 0.5(8)    | C16  | C17  | C18  | C19  | 179.8(6)  |
| C13  | C18  | C19  | C20  | -155(13)  | C17  | C18  | C19  | C20  | 23(13)    |
| C18  | C19  | C20  | C21  | -2(25)    | C19  | C20  | C21  | C26  | -24(15)   |
| C19  | C20  | C21  | C22  | 156(15)   | C26  | C21  | C22  | F6   | -179.1(5) |
| C20  | C21  | C22  | F6   | 1.1(8)    | C26  | C21  | C22  | C23  | 1.4(8)    |
| C20  | C21  | C22  | C23  | -178.4(5) | F6   | C22  | C23  | C24  | 179.8(5)  |
| C21  | C22  | C23  | C24  | -0.7(9)   | F6   | C22  | C23  | Ge1  | -1.1(8)   |
| C21  | C22  | C23  | Ge1  | 178.4(4)  | C7   | Ge1  | C23  | C22  | -69.4(5)  |

Supplementary Material (ESI) for Chemical Communications  
 This journal is (c) The Royal Society of Chemistry 2008

|     |     |     |     |           |     |     |     |     |           |
|-----|-----|-----|-----|-----------|-----|-----|-----|-----|-----------|
| C1  | Gel | C23 | C22 | 64.5(6)   | C28 | Gel | C23 | C22 | 179.5(5)  |
| C7  | Gel | C23 | C24 | 109.8(4)  | C1  | Gel | C23 | C24 | -116.3(4) |
| C28 | Gel | C23 | C24 | -1.3(4)   | C22 | C23 | C24 | C25 | 0.1(8)    |
| Gel | C23 | C24 | C25 | -179.2(4) | C22 | C23 | C24 | C27 | -179.8(5) |
| Gel | C23 | C24 | C27 | 0.9(6)    | C23 | C24 | C25 | F8  | -178.6(5) |
| C27 | C24 | C25 | F8  | 1.3(8)    | C23 | C24 | C25 | C26 | -0.2(8)   |
| C27 | C24 | C25 | C26 | 179.7(5)  | C22 | C21 | C26 | F7  | -179.7(4) |
| C20 | C21 | C26 | F7  | 0.2(8)    | C22 | C21 | C26 | C25 | -1.5(9)   |
| C20 | C21 | C26 | C25 | 178.3(5)  | F8  | C25 | C26 | F7  | -2.3(7)   |
| C24 | C25 | C26 | F7  | 179.2(4)  | F8  | C25 | C26 | C21 | 179.5(5)  |
| C24 | C25 | C26 | C21 | 1.0(9)    | C25 | C24 | C27 | C32 | -0.1(9)   |
| C23 | C24 | C27 | C32 | 179.8(5)  | C25 | C24 | C27 | C28 | -179.7(5) |
| C23 | C24 | C27 | C28 | 0.2(7)    | C32 | C27 | C28 | C29 | 0.1(7)    |
| C24 | C27 | C28 | C29 | 179.7(5)  | C32 | C27 | C28 | Gel | 179.1(4)  |
| C24 | C27 | C28 | Gel | -1.2(5)   | C7  | Gel | C28 | C29 | 65.8(5)   |
| C1  | Gel | C28 | C29 | -64.5(5)  | C23 | Gel | C28 | C29 | -179.7(5) |
| C7  | Gel | C28 | C27 | -113.2(4) | C1  | Gel | C28 | C27 | 116.6(4)  |
| C23 | Gel | C28 | C27 | 1.4(4)    | C27 | C28 | C29 | F11 | -179.8(4) |
| Gel | C28 | C29 | F11 | 1.3(8)    | C27 | C28 | C29 | C30 | -0.3(9)   |
| Gel | C28 | C29 | C30 | -179.1(4) | F11 | C29 | C30 | C31 | -179.1(4) |
| C28 | C29 | C30 | C31 | 1.3(9)    | F11 | C29 | C30 | C33 | 2.6(8)    |
| C28 | C29 | C30 | C33 | -177.0(5) | C29 | C30 | C31 | F10 | -178.9(5) |
| C33 | C30 | C31 | F10 | -0.5(8)   | C29 | C30 | C31 | C32 | -2.3(8)   |
| C33 | C30 | C31 | C32 | 176.1(5)  | F10 | C31 | C32 | F9  | -1.9(7)   |
| C30 | C31 | C32 | F9  | -178.5(4) | F10 | C31 | C32 | C27 | 178.9(5)  |
| C30 | C31 | C32 | C27 | 2.3(9)    | C28 | C27 | C32 | F9  | 179.8(4)  |
| C24 | C27 | C32 | F9  | 0.2(9)    | C28 | C27 | C32 | C31 | -1.1(8)   |
| C24 | C27 | C32 | C31 | 179.3(5)  | C29 | C30 | C33 | C34 | 88(13)    |
| C31 | C30 | C33 | C34 | -91(13)   | C30 | C33 | C34 | C35 | 109(82)   |
| C33 | C34 | C35 | C40 | -8(87)    | C33 | C34 | C35 | C36 | 170(100)  |
| C40 | C35 | C36 | F12 | -179.7(5) | C34 | C35 | C36 | F12 | 1.3(8)    |
| C40 | C35 | C36 | C37 | 0.7(8)    | C34 | C35 | C36 | C37 | -178.3(5) |
| F12 | C36 | C37 | F13 | 0.8(8)    | C35 | C36 | C37 | F13 | -179.6(5) |
| F12 | C36 | C37 | C38 | 179.0(5)  | C35 | C36 | C37 | C38 | -1.4(9)   |
| F13 | C37 | C38 | F14 | -0.7(9)   | C36 | C37 | C38 | F14 | -178.8(5) |
| F13 | C37 | C38 | C39 | -179.6(5) | C36 | C37 | C38 | C39 | 2.3(10)   |
| F14 | C38 | C39 | F15 | 1.9(9)    | C37 | C38 | C39 | F15 | -179.2(6) |
| F14 | C38 | C39 | C40 | 178.7(5)  | C37 | C38 | C39 | C40 | -2.4(9)   |
| C36 | C35 | C40 | F16 | 179.3(4)  | C34 | C35 | C40 | F16 | -1.6(8)   |
| C36 | C35 | C40 | C39 | -0.9(9)   | C34 | C35 | C40 | C39 | 178.2(5)  |
| F15 | C39 | C40 | F16 | -1.7(8)   | C38 | C39 | C40 | F16 | -178.5(5) |
| F15 | C39 | C40 | C35 | 178.5(5)  | C38 | C39 | C40 | C35 | 1.7(9)    |
